1                   **Light regulated SIK1 remodels the synaptic**  
2                   **phosphoproteome to induce sleep**

3  
4  
5           Lewis Taylor<sup>1</sup>, Teele Palumaa<sup>1</sup>, Paul K Reardon<sup>1</sup>, Steven Walsh<sup>1</sup>, Bradley H  
6           Johnson<sup>1</sup>, Sabrina Liberatori<sup>2</sup>, Sibah Hasan<sup>1</sup>, Kristopher Clark<sup>3</sup>, Philip Cohen<sup>3</sup>,  
7           Sridhar Vasudevan<sup>4</sup>, Stuart Peirson<sup>1</sup>, Shabaz Mohammed<sup>2</sup>, Vladyslav Vyazovskiy<sup>5</sup>,  
8                           Russell G Foster<sup>1\*</sup> and Aarti Jagannath<sup>1\*</sup>

9  
10           \* Correspondence to AJ ([aarti.jagannath@ndcn.ox.ac.uk](mailto:aarti.jagannath@ndcn.ox.ac.uk)) and RGF  
11                           ([russell.foster@eye.ox.ac.uk](mailto:russell.foster@eye.ox.ac.uk))

12  
13  
14           <sup>1</sup>Sleep and Circadian Neuroscience Institute (SCNi), Nuffield Department of Clinical  
15           Neurosciences, New Biochemistry Building, University of Oxford, South Parks Road,  
16                           Oxford, OX1 3QU, U.K.

17  
18                   <sup>2</sup>Departments of Chemistry and Biochemistry, University of Oxford  
19           New Biochemistry building, South Parks Road, Oxford, OX1 3QU, U.K.

20  
21           <sup>3</sup>MRC Protein Phosphorylation and Ubiquitylation Unit, University of Dundee, Sir  
22                           James Black Centre, Dow Street, Dundee DD1 5EH, U.K.

23  
24           <sup>4</sup>Department of Pharmacology, University of Oxford, Mansfield Road, Oxford OX1  
25                           3QT, U.K.

26  
27           <sup>5</sup>Department of Physiology, Anatomy and Genetics, University of Oxford, South  
28                           Parks Road, Oxford OX1 3PT, U.K.

34 SUMMARY

35

36 The sleep and circadian systems act in concert to regulate sleep-wake timing, yet the  
37 molecular mechanisms that underpin their interaction to induce sleep remain  
38 unknown. Synaptic protein phosphorylation, driven by the kinase SIK3, correlates with  
39 sleep pressure, however it is unclear whether these phosphoproteome changes are  
40 causally responsible for inducing sleep. Here we show that the light-dependent activity  
41 of SIK1 controls the phosphorylation of a subset of the brain phosphoproteome to  
42 induce sleep in a manner that is independent of sleep pressure. By uncoupling  
43 phosphorylation and sleep induction from sleep pressure, we establish that synaptic  
44 protein phosphorylation provides a causal mechanism for the induction of sleep under  
45 different environmental contexts. Furthermore, we propose a framework that details  
46 how the salt-inducible kinases regulate the synaptic phosphoproteome to integrate  
47 exogenous and endogenous stimuli, thereby providing the molecular basis upon which  
48 the sleep and circadian systems interact to control the sleep-wake cycle.

49

50 INTRODUCTION

51

52 Sleep is a reversible, complex and near ubiquitous behavioural state that results from  
53 the interaction of multiple neuronal, hormonal and biochemical circuits (Scammell et  
54 al., 2017). Currently the dynamics of sleep are explained by the two-process model,  
55 which details two drives that act in concert to regulate sleep timing; the circadian  
56 system, known as Process C, and sleep homeostasis, known as Process S (Borbély,  
57 1982; Borbély et al., 2016). Our molecular understanding of Process C has advanced  
58 rapidly over the past few decades, and we now know that circadian rhythms, the near  
59 24-hour oscillations in multiple physiological and behavioural processes, are  
60 generated by the molecular circadian clock; a complex series of interconnected  
61 transcription-translation feedback loops (Takahashi, 2017). This timekeeping  
62 mechanism is found in almost every cell of the body, and these clocks are both  
63 synchronised with one another and aligned (entrained) to the external environment  
64 (Golombek and Rosenstein, 2010; Legates et al., 2014), in a process orchestrated by  
65 a master circadian pacemaker located within the suprachiasmatic nuclei (SCN) (Foster  
66 et al., 2020; Hastings et al., 2018; Jagannath et al., 2013; Mieda, 2019). Ultimately this

67 allows the temporal optimisation of physiology and behaviour to the varied demands  
68 of day and night (Reppert and Weaver, 2002).

69

70 In comparison, the exact molecular nature of Process S and the molecular substrates  
71 that underpin and control sleep still remain almost entirely unknown. Furthermore,  
72 whilst the two-process model provides an accurate behavioural level description of the  
73 sleep-wake cycle, the molecular basis of the interaction between the sleep and  
74 circadian system that acts to drive sleep has yet to be elucidated (Ode and Ueda,  
75 2020). However, recent studies have highlighted the possible role of the synaptic  
76 phosphoproteome in sleep induction and regulation, as synaptic protein  
77 phosphorylation has been found to correlate with high levels of sleep pressure, and  
78 thus sleep itself. Notably, the salt-inducible kinase, SIK3 is proposed to mediate these  
79 synaptic phosphoprotein changes (Brüning et al., 2019; Wang et al., 2018). Whilst  
80 providing the foundation for the intriguing hypothesis that the molecular basis of sleep  
81 induction may be encoded at the level of the synaptic phosphoproteome, currently  
82 these studies cannot establish causation, and instead only demonstrate a correlation  
83 between synaptic protein phosphorylation and sleep (Ode and Ueda, 2020).  
84 Furthermore, whether sleep-promoting external inputs such as light, that operate  
85 independently of sleep pressure and/or sleep history, also impact the synaptic  
86 phosphoproteome is entirely unknown. Therefore, in this study we sought to determine  
87 whether synaptic protein phosphorylation provides a causal and universal mechanism  
88 for the induction of sleep under different environmental contexts.

89

90 To address this aim, we focussed our efforts on the salt-inducible kinases, as SIK3  
91 has been proposed to mediate the synaptic phosphoprotein changes observed at  
92 times of high sleep pressure (Wang et al., 2018), and we have shown previously that  
93 the related kinase SIK1 is light-induced and determines the rate of circadian re-  
94 entrainment following nocturnal light exposure as a consequence of a delayed or  
95 advanced light/dark cycle (Jagannath et al., 2013). As related kinases have similar  
96 substrates, we hypothesised that SIK1 might also regulate this core set of synaptic  
97 phosphoproteins to provide information on environmental light to the sleep system,  
98 independently from sleep pressure. If true, this would allow us to establish causality  
99 by uncoupling synaptic protein phosphorylation and sleep induction from sleep  
100 pressure. By utilising a SIK1 kinase-inactive transgenic mouse line, we demonstrate

101 that the light-dependent activity of SIK1 controls the phosphorylation of a subset of the  
102 brain phosphoproteome to induce sleep in a manner that is independent of sleep  
103 pressure. This allows us to conclude, for the first time, that synaptic protein  
104 phosphorylation is causally responsible for sleep induction and provides the molecular  
105 substrate by which Process S and Process C interact to regulate the sleep-wake cycle.  
106 Furthermore, our data highlights the SIK family as a key regulator of this process that  
107 has evolved to buffer the sleep and circadian systems against dynamic environmental  
108 and physiological challenges.

109

## 110 RESULTS

111

112 *Light induced SIK1 regulates the induction of sleep in a manner independent from*  
113 *sleep pressure*

114

115 To examine the hypothesis that the activity of SIK1 induces sleep in response to light  
116 independently from sleep pressure, we examined the behavioural phenotype of SIK1  
117 kinase-inactive knock-in (KI) mice, in which the wild type (WT) *Sik1* gene has been  
118 replaced with a catalytically inactive version (Darling et al., 2016). We predicted that if  
119 SIK1 is induced only after a light/dark cycle shift, as we have previously shown  
120 (Jagannath et al., 2013), then SIK1 KI animals would have normal circadian activity  
121 and sleep architecture under baseline conditions, but would display abnormal  
122 circadian behaviour following nocturnal light exposure that occurs as a consequence  
123 of the shifted light/dark cycle (Figure 1A). This is indeed the case. We undertook  
124 extensive circadian and sleep phenotyping of WT and SIK1 KI animals and found no  
125 major circadian or EEG sleep differences between WT and SIK1 KI mice housed under  
126 stable light/dark or constant conditions (Figures S1 and S2). Nocturnal light/CREB  
127 signalling, however, resulted in the specific induction of SIK1, and not its related family  
128 members SIK2 or SIK3 (Figures S3A-S3I), highlighting that SIK1 exclusively encodes  
129 environmental light input.

130

131 When then subjected to a 6-hour light advance, SIK1 KI animals displayed significantly  
132 enhanced circadian behavioural re-entrainment (Figures S3J and S3K). Importantly,  
133 this rapid re-entrainment phenotype was entirely light-driven, as during a 6-hour dark  
134 advance, the enhanced behavioural shifting of SIK1 KI animals was delayed until after

135 exposure to the first advanced light period (Figures S3L and S3M). SIK1 KI animals  
136 also displayed enhanced re-entrainment to a series of light intensities (Figures S3N-  
137 S3R) and had greater phase-shifting responses to phase delaying and advancing light  
138 pulses (Figures S3S and S3T). Additionally, SIK1 KI animals suppressed wheel-  
139 running activity (masked) normally in response to nocturnal light (Figure S3U).  
140 Notably, when released into constant darkness 3 days after a 6-hour light advance,  
141 their enhanced behavioural re-entrainment was maintained (Figures S3V-S3X), with a  
142 significant period shortening in the first 3 days of darkness (Figures S3V, S3W and  
143 S3Y). This demonstrates that the re-alignment was due to a shifting of the circadian  
144 pacemaker rather than a masking effect or an artefact of the altered light/dark cycle.  
145 Collectively, these data demonstrate that SIK1, in an entirely light-dependent manner,  
146 directly regulates behavioural re-alignment following a light/dark cycle shift.

147

148 We next undertook EEG measurement of sleep in WT and SIK1 KI animals before and  
149 after a 6-hour light/dark cycle advance (Figure 1A). The SIK1 KI animals displayed  
150 rapid behavioural re-entrainment (Figures 1B and 1C) thereby validating that this  
151 cohort would allow us to assess the role of SIK1 in regulating sleep dynamics and  
152 architecture nocturnal light exposure. Interestingly, the light/dark cycle shift resulted in  
153 an acute and transient induction of sleep in WT mice that was entirely absent in the  
154 SIK1 KI animals (Figure 1D). We found that nocturnal light induced both non-rapid eye  
155 movement (NREM) and rapid eye movement (REM) sleep in WT mice during the dark  
156 period after the light/dark shift, whereas SIK1 KI animals displayed a total lack of sleep  
157 induction; NREM, REM and total sleep time remained the same as under baseline  
158 conditions (Figures 1E-1G).

159

160 Crucially, this lack of sleep induction in SIK1 KI animals was not due to underlying  
161 differences in sleep pressure. On the first day following the light/dark cycle shift, slow  
162 wave activity (SWA - an electrophysiological metric of sleep need (Wang et al., 2018))  
163 was indistinguishable between WT and SIK1 KI mice (Figure 1H), yet SIK1 KI animals  
164 spent significantly less time asleep (Figure 1I). Taken together, our data demonstrate  
165 that nocturnal light acts through SIK1 to induce sleep in a manner that is entirely  
166 independent of sleep pressure.

167

168 *Nocturnal light exposure remodels the brain transcriptome and phosphoproteome*

169

170 The same data show that the sleep induction we observed in WT animals following a  
171 light/dark cycle shift was also not caused by changes in sleep pressure (Figures 1H  
172 and 1I). A comparison between the time course of sleep on the baseline day and shift  
173 day one found that the WT animals spent significantly more time asleep after dark  
174 onset (ZT12) on the first full day following the light/dark shift (Figure 2A). Significantly  
175 however, SWA was not different, at any time point, between the baseline day and after  
176 the light/dark shift (Figure 2B). Furthermore, whilst the increased sleep seen on shift  
177 day one (Figure 2A) resulted in higher levels of cumulative sleep pressure in early part  
178 of the dark phase (Figure 2C), the total sleep pressure accumulated at the end of shift  
179 day one was the same as baseline, demonstrating that this extra sleep was not driven  
180 by the sleep homeostat (Figure 2C). Therefore, the relative increase in sleep after light  
181 exposure in WT animals was not accompanied by a change in sleep pressure before,  
182 during, or after the sleep induction (Figure 1D).

183

184 Next, we wanted to determine the molecular mechanism that underpins nocturnal light-  
185 induced sleep. As SIK1 regulates CREB-dependent transcription in response to light  
186 and protein phosphorylation, we characterised the SCN and cortical transcriptome,  
187 and the whole brain phosphoproteome, of WT mice subjected a six-hour light/dark  
188 cycle advance (Figure 2E). RNA sequencing of the SCN and cortex six hours into the  
189 shifted light/dark cycle identified 537 and 102 genes respectively, that were  
190 differentially regulated following nocturnal light exposure (Figure S4 and Table S1).  
191 These genes mapped on to molecular functions that were largely distinct between the  
192 two tissues, however protein phosphorylation terms, including kinase activity and  
193 binding, as well as phosphatase activity, were enriched in both the SCN and cortex  
194 following nocturnal light exposure (Figures S4B, S4C, S4E and S4F).

195

196 Quantitative phosphoproteomics of whole brains harvested under sham or advanced  
197 light/dark cycle conditions (Figure 2E) identified 10,778 phosphopeptides in total  
198 (derived from 2730 proteins), of which 324 (mapping to 239 unique proteins) were  
199 found to be light regulated (Figure 2F and Table S2). Of these, 217 were  
200 hypophosphorylated and 107 were hyperphosphorylated (Figure 2F). GO cellular  
201 component analysis found enrichment for pre and postsynaptic proteins (Figure 2G),  
202 including microtubule-associated proteins (MAP1A/B), ion channels (SCN1A,



203 CACNA1E), NMDA receptor subunits (GRIN2B), kinases (CAMK2B and CDKL5),  
204 synaptic vesicle proteins (SYN1) and presynaptic active zone proteins (BSN, PCLO)  
205 (Figure 2F), indicating that these phosphoprotein changes impact upon important  
206 neuronal and synaptic functions and processes. Indeed, GO molecular function  
207 pathway analysis found overrepresentation of kinase binding and activity,  
208 transcriptional regulation, ion channel and neurotransmitter receptor function, and  
209 microtubule binding (Figure 2H). STRING protein-protein interaction mapping found  
210 that these phosphoproteins form a densely connected interaction network (Figure 2I),  
211 and demonstrated that these proteins act together as a highly integrated set to  
212 orchestrate synaptic, neuronal and whole brain physiology following nocturnal light  
213 exposure.

214

215 *The light induced and the sleep need induced phosphoproteomes overlap and*  
216 *independently result in behavioural sleep induction*

217

218 A large number of these phosphoproteins have been shown previously to be  
219 differentially phosphorylated at times of high sleep need. Wang *et al.* document a list  
220 of 80 proteins, termed sleep need index phosphoproteins (SNIPPs), whose  
221 hyperphosphorylation correlates with increased sleep need (Wang *et al.*, 2018).  
222 Notably 19 of these proteins overlapped significantly with the phosphoproteins  
223 identified in our study (Figure 2J - Fisher's exact test p value =  $3.5 \times 10^{-5}$ ). Interestingly,  
224 these SNIPPs were curated from a larger list of proteins that were phosphorylated in  
225 response to sleep deprivation and/or in the *Sleepy* transgenic mouse line, which has  
226 increased daily sleep due to constitutively high SWA (Funato *et al.*, 2016; Honda *et al.*  
227 *et al.*, 2018; Wang *et al.*, 2018). When comparing the intersection of our results with this  
228 larger set, we found a highly significant overlap of 53 phosphoproteins (Figure 2K –  
229 Fisher's exact test p value =  $1.6 \times 10^{-9}$ ). In addition, a recent study by Brüning *et al.*  
230 examining brain protein phosphorylation over the circadian day, and in response to  
231 sleep deprivation, also found synaptic protein hyperphosphorylation at times of  
232 increased sleep pressure (Brüning *et al.*, 2019). Of these, 50 overlapped with our  
233 nocturnal light phosphoproteins (Figure 2L – Fisher's exact test p value =  $1.0 \times 10^{-9}$ ).  
234 Therefore, the light induced and sleep need-induced synaptic phosphoproteomes  
235 clearly overlap (Table S3).

236

237 However, at the corresponding time where we found altered protein phosphorylation  
238 in WT animals, we observed no change in SWA; indeed the level was indistinguishable  
239 to SWA under the equivalent baseline condition (Figure 2M), whereas a six-hour sleep  
240 deprivation conducted in the same animals as a positive control significantly increased  
241 SWA (Figure 2M). This clearly indicated that the changes we observed in protein  
242 phosphorylation (Figure 2F) were not caused by increased sleep pressure, but rather  
243 by nocturnal light exposure. Collectively, these results suggested to us that synaptic  
244 protein phosphorylation in response to light may be causally responsible for sleep  
245 induction.

246

247 *SIK1 induced changes in the brain phosphoproteome are necessary and sufficient to*  
248 *induce sleep following nocturnal light exposure*

249

250 As nocturnal light exposure remodels the synaptic phosphoproteome and induces  
251 sleep in WT mice, but this sleep induction is missing in SIK1 KI animals, we  
252 hypothesised that SIK1 co-ordinates the synaptic phosphoproteome to induce sleep  
253 in response to nocturnal light. Therefore, we examined the whole brain  
254 phosphoproteome of SIK1 KI animals following the same light/dark cycle shift as used  
255 for the sleep analysis (Figure 2E), and anticipated that SIK1 KI animals would have an  
256 abnormal phosphoproteome following nocturnal light exposure. Indeed, we found that  
257 99 phosphoproteins (from 88 unique proteins) were differentially regulated between  
258 WT and SIK1 KI animals following nocturnal light exposure, with 57 hyper- and 42  
259 hypophosphorylated in SIK1 KI animals in comparison to WT mice (Figure 3A). Many  
260 of these phosphoproteins are both nocturnal light and sleep pressure associated  
261 (Figures 2F and 2J-2L), including PCLO, BSN, ANK2, AKAP12, SORBS2 and GRK5,  
262 and the majority are hypophosphorylated in SIK1 KI animals (Figure 3A and Table  
263 S2). Critically, these phosphoprotein differences were not due to underlying  
264 differences in SWA architecture in SIK1 KI animals, as they displayed identical SWA  
265 levels to WT mice under baseline conditions and during the first day of the shifted  
266 light/dark cycle (Figure 1H). GO molecular function pathway analysis of these  
267 differential phosphoproteins found overrepresentation of terms similar to those in the  
268 WT nocturnal light phosphoproteome (Figures 3B and 2H), demonstrating that these  
269 pathways are dysregulated in SIK1 KI animals. Indeed, 35 proteins that were  
270 differentially phosphorylated in response to nocturnal light in WT mice displayed a



271 different phosphorylation state in SIK1 KI animals (Figure 3C and Table S3), with many  
272 mapping onto recognised elements of light entrainment pathways within the SCN. For  
273 example, ADCY5 controls the production of cAMP (Dessauer et al., 2017), ATF2  
274 mediates CREB-dependent gene transcription (Watson et al., 2017), and MAPK8 and  
275 MAPK10 regulate light-induced phase shifting (Goldsmith and Bell-Pedersen, 2013;  
276 Yoshitane et al., 2012).

277

278 Notably however, 17 of these SIK1 regulated phosphoproteins have been linked  
279 previously to sleep/wake history (Figure 3D and Table S3), and we suggest that these  
280 phosphoproteins form the core mechanism that conveys molecular level changes at  
281 the synapse to the causal induction of sleep. As such we have termed these keystone  
282 sleep phosphoproteins (KSPs). When these are phosphorylated, as is the case in WT  
283 mice following nocturnal light exposure, sleep is induced (Figures 1D-1G and 2F).  
284 However, when they are not phosphorylated, as is the case in SIK1 KI mice after  
285 nocturnal light exposure, sleep is not induced (Figures 1D-1G and 3A). Therefore,  
286 SIK1 induced changes in the synaptic phosphoproteome are necessary and sufficient  
287 to induce sleep following nocturnal light exposure. Intriguingly, some phosphorylation  
288 changes persist, and are even gained, in the absence of a functional SIK1 (Figures  
289 3C, 3E and Table S2), and demonstrates that the phosphoprotein landscape is  
290 complex and likely relies on a cascade of kinase and phosphatase activity. Indeed,  
291 CAMK2B, CAMK2D, MAPK8, MAPK10, PPP6R1 and PTPN4 displayed differential  
292 phosphorylation in our data set, and CAMK2A/B and ERK have been previously shown  
293 to regulate sleep duration and dynamics (Mikhail et al., 2017; Tatsuki et al., 2016).  
294 Together these results demonstrate that the light-dependent activity of SIK1 controls  
295 the phosphorylation of a subset of the brain phosphoproteome to induce sleep in  
296 response to nocturnal light, in a manner that is independent of sleep pressure (Figure  
297 3F).

298

299 *SIK1 KI animals display normal sleep induction and synaptic protein phosphorylation*  
300 *following acute sleep deprivation*

301

302 It is clear that SIK1 KI animals do not correctly regulate the phosphorylation of KSPs  
303 in response to light and sleep is not induced. In order to confirm causality, we sought  
304 to determine whether we could achieve the correct phosphorylation of the KSPs via a

305 different modality in SIK1 KI animals, and whether this would result in normal sleep  
306 induction. If so, this would demonstrate that synaptic protein phosphorylation is indeed  
307 causal for the induction of sleep. To this end, we utilised the fact that SIK3 activity is  
308 preserved in SIK1 KI animals (Darling et al., 2016), and subjected them to six hours  
309 of sleep deprivation. In this scenario, SIK3 would drive synaptic protein  
310 phosphorylation due to the increased sleep pressure, and therefore if these  
311 phosphorylation changes are essential for sleep induction, SIK1 KI animals should  
312 display normal sleep architecture and homeostasis and synaptic protein  
313 phosphorylation following acute sleep deprivation.

314

315 Indeed, quantitative whole brain phosphoproteomics demonstrated that SIK1 KI  
316 animals differentially regulated 2289 phosphopeptides (1166 hyperphosphorylated  
317 and 1123 hypophosphorylated) following sleep deprivation, with approximately 50%  
318 being previously sleep need associated (Figure 4A and Table S4). Many of these were  
319 also keystone sleep phosphopeptides (Figures 4A, 3D and Tables S3 and S4).  
320 Importantly, this phosphorylation landscape closely mirrored that of the WT animals,  
321 with the average phosphopeptide intensities being highly correlated (Pearson  $r =$   
322  $0.8125$ ) between WT and SIK1 KI sleep deprived samples (Figure 4B). Indeed, there  
323 was a highly significant overlap between the phosphoproteins that displayed  
324 differential phosphorylation in WT and SIK1 KI animals, demonstrating that the vast  
325 majority of the phosphoprotein landscape is similarly regulated in both genotypes  
326 following sleep deprivation (Figure 4C - Fisher's exact test  $p$  value =  $1.6 \times 10^{-48}$  and  
327 Table S4). In contrast, there was much less similarity between the nocturnal light-  
328 driven WT and SIK1 KI phosphoproteomes as their degree of overlap was far smaller  
329 (Figure 3C). Critically, 131 (54%) of the Brüning *et al* sleep associated  
330 phosphoproteins (Figure 4D), 121 (45%) of the Wang *et al* sleep associated  
331 phosphoproteins (Figure 4E), 42 (53%) of the SNIPPs (Figure 4F) and, most  
332 importantly, 12 (71%) of the keystone sleep phosphoproteins (Figure 4G) were  
333 similarly regulated in both WT and SIK1 KI animals after acute sleep deprivation (Table  
334 S4). Therefore, SIK1 KI animals correctly phosphorylate sleep associated  
335 phosphoproteins following sleep deprivation.

336

337 This was accompanied by subsequent normal sleep induction and architecture as in  
338 comparison to WT mice, SIK1 KI animals exhibited no discernible difference in sleep

339 homeostasis following sleep deprivation; they accumulated and dissipated SWA  
340 identically (Figures 4H and 4I) and displayed completely normal rebound sleep  
341 architecture (Figures 4J-4L and Figure S5). Taken together, these results demonstrate  
342 that synaptic protein phosphorylation is necessary and sufficient, and therefore causal,  
343 for the induction of sleep. Furthermore, they advance our basic understanding of the  
344 regulatory mechanisms underpinning sleep and highlight the salt-inducible kinase  
345 family as a key regulator of synaptic protein phosphorylation and sleep induction.

346

## 347 DISCUSSION

348

349 In this study we utilised a SIK1 kinase-inactive mouse line to uncouple phosphorylation  
350 and sleep induction from sleep pressure and determine that synaptic protein  
351 phosphorylation provides a causal mechanism for the induction of sleep under  
352 different environmental contexts. In fact, the usage of a loss-of-function model was  
353 central to our discovery that SIK1 controls synaptic protein phosphorylation and sleep  
354 induction only after exposure to nocturnal light. Whilst previous studies have proved  
355 seminal in demonstrating the role of salt-inducible kinases in regulating sleep, they  
356 have all used gain-of-function mutants (Funato et al., 2016; Honda et al., 2018; Park  
357 et al., 2020; Wang et al., 2018), which cannot explain how the kinase is endogenously  
358 regulated, and therefore have likely missed exactly when and how the SIKs act to  
359 regulate sleep. Indeed, a previous study examining the role of SIK1 in sleep found that  
360 the *Sik1*<sup>S577A</sup> gain-of-function mutant displayed increased sleep duration under stable  
361 light/dark conditions (Park et al., 2020). This is not surprising as SIK1 is able to  
362 phosphorylate the same targets as SIK2 or SIK3 when activated, however SIK1 is  
363 exclusively induced by light, which could not be captured in the study above (Park et  
364 al., 2020). Instead, we show here that SIK1 inactive mutant animals had normal  
365 baseline sleep, and only displayed sleep abnormalities following nocturnal light  
366 exposure.

367

368 We also demonstrate here that the light-dependent activity of SIK1 is necessary and  
369 sufficient to coordinate circadian and behavioural realignment after a light/dark cycle  
370 shift. A group of 35 proteins were identified, whose phosphorylation is controlled by  
371 SIK1 in response to nocturnal light, and we propose that these phosphoproteins play  
372 a major role is adjusting physiology and behaviour to the astronomical day. Indeed,

373 many of these proteins are regulatory elements of light-dependent entrainment within  
374 the SCN. For example, ATF2 is a transcription factor that heterodimerises with CREB  
375 to mediate gene transcription by binding promoter localised cAMP response elements  
376 (Watson et al., 2017), and the membrane bound adenylyl cyclase ADCY5 controls the  
377 production of cAMP (Dessauer et al., 2017). Alongside, AKAP12 regulates the cellular  
378 localisation of PKA (Sanderson and Dell'Acqua, 2011) and this cAMP/PKA/CREB  
379 pathway is central for mediating light-induced gene expression and shifting of the  
380 molecular circadian clock (O'Neill et al., 2008). Furthermore, we found that SIK1 also  
381 controlled the phosphorylation of MAPK8 and MAPK10; two kinases known to regulate  
382 phase shifting in response to nocturnal light (Goldsmith and Bell-Pedersen, 2013;  
383 Yoshitane et al., 2012).

384

385 Importantly however, we detail 17 phosphoproteins identified as both SIK1 and sleep  
386 need regulated, termed keystone sleep phosphopeptides, that we believe lie at the  
387 centre of the mechanisms that convey molecular level changes at the synapse to the  
388 causal induction of sleep. Indeed, these proteins are known to regulate synaptic  
389 organisation, presynaptic neurotransmitter release and postsynaptic signalling.  
390 Presynaptically, AMPH plays a crucial role in controlling synaptic vesicle recycling (Di  
391 Paolo et al., 2002), and the presynaptic active zone proteins BSN and PCLO are  
392 essential for regulating synaptic vesicle docking, fusion and neurotransmitter release  
393 (Gundelfinger et al., 2016). Postsynaptically, many of the sleep-inducing  
394 phosphoproteins are core components of the postsynaptic density (PSD) and regulate  
395 downstream neurotransmitter signalling. ANK2 acts as a scaffolding protein that  
396 regulates synaptic stability (Bulat et al., 2014; Koch et al., 2008), whereas DLAGP2  
397 and SORBS2 are both PSD scaffolding proteins that regulate excitatory  
398 neurotransmission by controlling the turnover and trafficking of AMPA glutamate  
399 receptors (Rasmussen et al., 2017; Zhang et al., 2016). Alongside, IQSEC2 (a guanine  
400 nucleotide exchange factor) also plays a critical role in glutamate receptor trafficking  
401 and regulates synaptic cytoskeletal organisation to impact downstream  
402 neurotransmitter signalling (Brown et al., 2016; Um, 2017). Interestingly IQSEC2 has  
403 been shown to interact with PSD-95, a scaffolding protein that complexes with  
404 HOMER1A to tether glutamate receptors to the PSD (Clifton et al., 2019; Dosemeci et  
405 al., 2007; Sakagami et al., 2008). As *Homer1a* is upregulated in response to sleep  
406 deprivation (Maret et al., 2007), and serves to drive excitatory synaptic downscaling

407 during sleep (Diering et al., 2017; Martin et al., 2019), this suggests that HOMER1A  
408 activity may also contribute to light induced sleep. Additionally, LRRC7, a major  
409 constituent of the PSD, controls Ca<sup>2+</sup> channel flux at excitatory synapses (ANK2 has  
410 also recently been found to have a similar function (Choi et al., 2019)) and  
411 interestingly, LRRC7 deficient mice have been found to have abnormal sleep  
412 behaviour (Carlisle et al., 2011). Similarly, both CAMK2B and CACNA1E were  
413 phosphorylated in response to nocturnal light. CAMK2B is a principal regulator of  
414 neurotransmitter release and synaptic function (and notably its dendritic localisation is  
415 controlled by LRRC7 (Jiao et al., 2011)), whilst CACNA1E forms one of the core Ca<sup>2+</sup>  
416 channels involved in synaptic neurotransmission (Kamp et al., 2005), and strikingly  
417 the genetic ablation of either protein results in abnormal sleep length duration (Siwek  
418 et al., 2014; Tatsuki et al., 2016). Therefore, we conclude that synaptic protein  
419 phosphorylation, in response to either nocturnal light or increasing sleep pressure,  
420 controls synaptic organisation and function to lead to the induction of sleep.

421  
422 Furthermore, we suggest that Process S and Process C, the fundamental components  
423 of the two-process model of sleep (Borbély, 1982; Borbély et al., 2016), converge upon  
424 the synaptic phosphoproteome through the action of the salt-inducible kinases. Not  
425 only does this provide a molecular mechanism by which the sleep and circadian  
426 systems interact, this highlights the SIK family as central to this process (Funato et al.,  
427 2016; Honda et al., 2018; Park et al., 2020; Wang et al., 2018). Here we propose a  
428 model of sleep regulation, whereby SIK1 and SIK3 both control the phosphorylation of  
429 a core group of synaptic proteins (Figure 5). Crucially however, their activity is induced  
430 by entirely different stimuli, with SIK1 activity dependent on light and SIK3 activity  
431 dependent on sleep pressure. Importantly, this model also explains how SIK1 KI  
432 animals display normal sleep and circadian behaviour under stable entrainment and  
433 after sleep deprivation; SIK1 KI mice have a fully functional copy of SIK3 (Darling et  
434 al., 2016). Additionally, the fact that the *Sik3 Sleepy* mutant has been reported to have  
435 a normal circadian system (Funato et al., 2016) also supports the model we propose,  
436 as SIK1 is intact in *Sleepy* mutant mice. Overall, this framework advances our basic  
437 understanding of the regulatory mechanisms underpinning sleep by highlighting how  
438 the salt-inducible kinases have evolved to perform distinct – but complementary –  
439 roles, to both buffer and integrate the sleep and circadian systems in response to  
440 dynamic environmental and physiological challenges.

441

## 442 ACKNOWLEDGEMENTS

443

444 This work was supported by the following sources of funding: BB/N01992X/1 David  
445 Phillips fellowship from the BBSRC to AJ, MRC\_MR/K000985/1 to PC, and  
446 WT106174/Z/14/ZMA from the Wellcome Trust to RGF.

447

## 448 AUTHOR CONTRIBUTIONS

449

450 LT, TP, BJ, and AJ conducted the experiments, LT, PKR and SW analysed data, KC  
451 and PC generated transgenic animals, AJ and RGF supervised the study with SP, SV  
452 and VV. In addition, SM oversaw proteomics studies in which SL participated, VV  
453 oversaw sleep EEG experiments in which SH participated. LT, RGF and AJ wrote the  
454 manuscript with input from all authors.

455

## 456 COMPETING INTERESTS

457

458 None to declare.

459

460

## 461 MATERIALS AND METHODS

462

## 463 RESOURCE AVAILABILITY

464

### 465 *Lead Contact*

466

467 Further information and requests for resources and reagents should be directed to and  
468 will be fulfilled by Aarti Jagannath ([aarti.jagannath@ndcn.ox.ac.uk](mailto:aarti.jagannath@ndcn.ox.ac.uk))

469

### 470 *Materials Availability*

471

472 This study did not generate new unique reagents.

473



474 *Data and Code Availability*

475

476 The datasets generated during this study will be deposited to the appropriate public  
477 repositories upon acceptance.

478

479 EXPERIMENTAL MODEL AND SUBJECT DETAILS

480

481 *In vitro cell culture studies*

482

483 Human U2OS cells and murine NIH3T3 cells were obtained from ATCC (ATCC® HTB-  
484 96™ and ATCC® CRL-1658™ respectively) and cultured in complete DMEM (DMEM  
485 supplemented with 10% FCS and 1% penicillin/streptomycin) at 37°C, 5% CO<sub>2</sub>. Cells  
486 were lifted by incubation with TrypLE express for 5 mins, diluted with complete DMEM  
487 and counted by trypan blue exclusion. Cells were either passaged into new tissue  
488 culture flasks, or plated into multi well plates for *in vitro* experiments.

489

490 *In vivo animal studies*

491

492 C57BL/6-Sik1<sup>tm2853(T182A)Arte</sup> animals (as previously described in (Darling et al., 2016))  
493 were used throughout this study and are herein referred to as SIK1 knock-in (SIK1 KI)  
494 mice. In these animals, the endogenous WT SIK1 gene has been replaced with a  
495 mutated version via homologous recombination, which results in the production of a  
496 SIK1 protein where threonine 182 (found in the activation loop of SIK1 and its  
497 phosphorylation by LKB1 is known to be critical for SIK1 activity) is mutated to alanine,  
498 rendering SIK1 catalytically inactive. The WT animals used in this study were littermate  
499 and age matched controls. All studies were conducted using mice over 8 weeks of age  
500 and unless otherwise indicated, animals were housed in groups with *ad libitum* access  
501 to food and water under a 12:12 hour light dark cycle (100 lux from white LED lamps).  
502 Animals were randomly assigned to experimental groups. Both male and female  
503 animals were used in this study, with the gender used indicated in the corresponding  
504 figure legend. All animal procedures were conducted in accordance with the UK Home  
505 Office regulations (Guidance on the Operation of Animals (Scientific Procedures Act)

506 1986) and the University of Oxford's Policy on the Use of Animals in Scientific  
507 research, taking into account the principles of the 3Rs.

508

## 509 METHOD DETAILS

510

### 511 *Circadian wheel-running activity monitoring*

512

513 WT and SIK1 KI animals were individually housed with *ad libitum* access to food and  
514 water and circadian running wheel activity measured under a 12 hour light/12 hour  
515 dark (100 lux - 12:12 LD) schedule, constant light (100 lux – LL) or constant darkness  
516 (DD). White LEDs were used as the light source. Activity data was collected using the  
517 ClockLab software package (Actimetrics, Wilmette, IL, USA).

518

### 519 *Light/dark cycle advance protocols*

520

521 WT and SIK1 KI animals were individually housed and circadian wheel-running  
522 behaviour was measured under a 12:12 LD cycle (100 lux). Following stable  
523 behavioural entrainment, either the light or dark phase was advanced by 6 hours and  
524 wheel-running activity measured until the mice have re-entrained to the new LD cycle.  
525 For the repeated advance protocol, WT and SIK1 KI animals were initially housed  
526 under a 12:12 LD cycle with the light intensity set to 100 lux. Following stable  
527 entrainment, either the light or dark phase was advanced by 6 hours and wheel-  
528 running activity measured. After mice had re-entrained to the new LD cycle, the light  
529 intensity was reduced and then the 6-hour shift repeated. This procedure was  
530 conducted at 100, 30, 10, 3 and 1 lux. For analysis, phase was calculated as time of  
531 activity onset minus time of dark onset.

532

### 533 *Light pulse and phase shifting protocols*

534

535 WT and SIK1 KI animals were individually housed and circadian wheel-running  
536 behaviour was measured under a 12:12 LD cycle (100 lux). Following stable  
537 behavioural entrainment, animals were released into DD and then received 30 minute  
538 100 lux light pulses, timed to fall between CT14-17. The phase angles before and after  
539 the light pulse were calculated and the resultant phase shift calculated. As per

540 convention, phase delays are negative and phase advances positive. In order to  
541 calculate light induced behavioural masking during the light pulse, the activity counts  
542 in the 30 minutes prior to the light pulse and during the 30 minute light pulse were  
543 calculated. Only pulse episodes where the 30 minutes prior to the light pulse had non-  
544 zero activity counts were included in the analysis.

545

#### 546 *Cell culture and stimulation*

547

548 Human U2OS cells and murine NIH3T3 cells were obtained from ATCC (ATCC® HTB-  
549 96™ and ATCC® CRL-1658™ respectively) and cultured in complete DMEM (DMEM  
550 supplemented with 10% FCS and 1% penicillin/streptomycin) at 37°C, 5% CO<sub>2</sub>. Cells  
551 were lifted by incubation with TrypLE express for 5 mins, pelleted, diluted with  
552 complete DMEM and counted by trypan blue exclusion, and then plated into 24 well  
553 plates (1x10<sup>5</sup> cells/well in 500 µl) and left overnight at 37°C, 5% CO<sub>2</sub>. The cells were  
554 then stimulated with either vehicle (0.5% DMSO), forskolin (10 µM) or dexamethasone  
555 (200 nM) for 1 hour at 37°C, 5% CO<sub>2</sub>. Following treatment, the cells were washed  
556 three times with 1 ml of PBS, the medium replaced with complete DMEM and then at  
557 the time points indicated the cells were lysed by the addition of 300 µl RLT buffer. The  
558 lysate was then stored at -80°C until RNA extraction was performed.

559

560

#### 561 *RNA extraction, cDNA synthesis and RT-PCR*

562

563 For cells lysed in RLT buffer, RNA was extracted using the RNeasy Plus Mini Kit  
564 following the manufacturer's instructions. For tissue RNA extraction, the tissue was  
565 firstly mechanically disrupted in 100 µl of Trizol. The sample was then made up to 500  
566 µl of Trizol, 100 µl chloroform added and then thoroughly mixed. Following a 5 min  
567 incubation at RT, the sample was then centrifuged for 15 min at 15,000 xg, 4°C. The  
568 clear top layer was then carefully collected, mixed with an equal volume of 70%  
569 ethanol and RNA extracted using the RNeasy Plus Mini Kit following the  
570 manufacturer's instructions. RNA concentration and quality was determined using a  
571 NanoDrop ND-1000 spectrophotometer and cDNA synthesized using the qScript  
572 cDNA synthesis kit. RT-PCR was then conducted using the Quantifast SYBR Green

573 PCR Kit and a StepOnePlus thermal cycler (Applied biosystems) with the following  
574 thermal profile: 95°C for 5 mins and then 40 cycles of 95°C for 10s, 60°C for 30s and  
575 72°C for 12 s. Quantification of transcript levels was conducted using the relative  
576 standard curve method, for comparing within a gene, or the  $2^{-\Delta\text{Ct}}$  method for  
577 comparison across genes. Primer sequences used can be found in Table S5.

578

#### 579 *RNA sequencing library preparation*

580

581 Following total RNA extraction, RNA sequencing libraries were prepared using the  
582 Illumina TruSeq Stranded Total RNA library prep gold kit following the manufacturer's  
583 instructions. Briefly, 150 ng of total RNA was depleted of ribosomal and mitochondrial  
584 ribosomal RNA, cleaned up using RNA clean XP beads (Beckman Coulter, High  
585 Wycombe, United Kingdom) and then fragmented. Next, first and second stand cDNA  
586 synthesis was conducted, and the resultant cDNA purified using AMPure XP beads  
587 (Beckman Coulter) and adenylated at the 3' end. Illumina indexing adapters were then  
588 ligated to the cDNA, the fragments purified and then enriched by PCR. Following  
589 amplification, the libraries were purified and then their concentration determined using  
590 the KAPA Library Quantification Kit for Illumina Platforms following the manufacturer's  
591 instructions. The libraries were then diluted to 4 nM and pooled in equal volumes prior  
592 to sequencing. Paired end RNA sequencing was then conducted using the NextSeq  
593 550 and a Nextseq 500/500 v2 75 cycle kit, with the library loaded at 1.8 pM.

594

#### 595 *RNA sequencing data analysis*

596

597 The raw reads were initially processed to remove adapter sequences and trim low  
598 quality ends. Reads were then mapped to the mouse reference genome (build  
599 GRCm38.98) using HISAT2 and gene counts generated using featureCounts (multi-  
600 mapping and multi-overlapping reads allowed). Prior to analysis, genes below the  
601 minimum expression threshold (total counts less than 10 across all samples) were  
602 removed and differential gene expression analysis conducted using DESeq2. Genes  
603 that had an uncorrected p value of <0.01 were taken to be statistically significant. For  
604 pathway analysis, significant differential gene lists were analysed using Enrichr

605 (Kuleshov et al., 2016) or g:Profiler (Raudvere et al., 2019) and then GO terms  
606 reduced and visualised using Revigo (Supek et al., 2011).

607

### 608 *EEG and EMG electrode implantation*

609

610 To continuously monitor sleep/wake states, custom electroencephalogram (EEG) and  
611 electromyography (EMG) headmounts were implanted as previously described.  
612 Briefly, surgical procedures were conducted under aseptic conditions and isoflurane  
613 anaesthesia (2-3% for induction, 1-2% for maintenance), with animals head-fixed in a  
614 stereotactic frame (David Kopf Instruments, California). Analgesia was administered  
615 immediately before the start of surgery (Metacam 1–2 mg/kg s.c. and Vetergesic 0.08  
616 mg/kg s.c.). Screw electrodes, mounted to an 8-pin surface mount connector (8415-  
617 SM, Pinnacle Technology Inc, Kansas), were implanted in the frontal (motor area,  
618 anteroposterior +2 mm, mediolateral 2 mm) and occipital (visual area, V1,  
619 anteroposterior –3.5 to –4 mm, mediolateral 2.5 mm) cortical areas and a reference  
620 electrode was implanted above the cerebellum. Two stainless-steel wires were  
621 implanted on each side of the nuchal muscle to record EMG and the entire headmount  
622 was then fixed to the skull using RelyX Unicem 2 dental cement (3M, Bracknell, UK).  
623 Following surgery animals were provided with thermal support, administered saline  
624 (0.1 mL/20 g s.c.), and then closely monitored, with analgesia provided if necessary  
625 (Metacam 1-2 mg/kg orally), during a 2-week recovery period. For sleep state  
626 recording, animals were individually housed in custom clear plexiglass cages (20.3 ×  
627 32 × 35 cm) kept in ventilated, sound-attenuated Faraday chambers (Campden  
628 Instruments, Loughborough, UK), under a 12:12 LD cycle (100 lux) with *ad libitum*  
629 access to food and water. For sleep deprivation, animals were kept awake for 6 hours  
630 between ZT0 and ZT6 by regularly providing various novel objects to elicit exploratory  
631 behaviour.

632

### 633 *Sleep signal processing, data acquisition and vigilance state scoring*

634

635 EEG, EMG and running wheel data was acquired using the Multi-channel  
636 Neurophysiology Recording System (Tucker-Davis Technologies, Alachua, FL). The  
637 EEG and EMG signals were filtered between 0.1 and 100 Hz, amplified using a PZ5  
638 NeuroDigitizer preamplifier (Tucker-Davis Technologies) and then collected at a

639 sampling rate of 256.9 Hz. Running wheel data (infra-red beam breaks by the running  
640 wheel rungs) was collected continuously. The EEG and EMG data were then  
641 resampled offline at 256 Hz, converted to .txt files using custom Matlab scripts and  
642 then converted to European data format (EDF) using Neurotraces software. Vigilance  
643 states were then assigned by manual inspection of consecutive 4 second epochs  
644 using the Sleepsign software (Kissei Comtec Co., Nagano, Japan). Vigilance states  
645 were classified as wake (low amplitude, high frequency EEG with associated EMG  
646 signal), non-rapid eye movement sleep (NREM – high amplitude, low frequency EEG  
647 signal with slow waves present) or REM sleep (low amplitude, high frequency theta  
648 EEG signal). Brief awakenings were defined as wake periods lasting only 4 epochs or  
649 less. Epochs that contained artefactual signals (resulting from contamination by  
650 eating, drinking, or gross movement) were scored as such so that they could be  
651 excluded from the appropriate analyses. EEG power spectra were then produced  
652 using a Fast Fourier Transform routine for all 4-second epochs, with a 0.25-Hz  
653 resolution. SWA activity is calculated as the average spectral power between 0.5-4 Hz  
654 of all NREM epochs in the desired time bin and expressed as a percentage of the  
655 average spectral power between 0.5-4 Hz of all NREM epochs over the entire baseline  
656 day.

657

#### 658 *Tissue total protein lysate preparation*

659

660 WT and SIK1 KI animals were housed under a 12:12 LD cycle (100 lux) and allowed  
661 to stably entrain. For sham samples, animals were sacrificed at ZT0 in complete  
662 darkness and for the shift samples, the light phase was advanced by 6 hours and the  
663 animals sacrificed 6 hours into the advanced light period. Their brains were removed  
664 and immediately flash frozen. Whole brain protein extraction was performed by lysing  
665 the entire brain in 5 ml tissue lysis buffer (8 M urea, 50 mM HEPES, 0.5% NaDOC, pH  
666 8.5, supplemented with protease and phosphatase inhibitor tablets (Roche)) using a  
667 dounce homogeniser (Sigma Aldrich, UK). The samples were then cleared by  
668 centrifugation for 20 min at 20,000 xg at 4°C, and protein concentration determined  
669 using a BCA protein assay kit (Thermo Fisher scientific, Loughborough, UK) following  
670 the manufacturer's protocol.

671



672 *Mass spectrometry sample preparation and phosphopeptide enrichment*

673

674 Mass spectrometry sample preparation and phosphopeptide enrichment was  
675 conducted as in (Wang et al., 2018), with a few modifications. One milligram of total  
676 protein was reduced (10 mM TCEP), alkylated (50 mM CAA) and then digested with  
677 Lys-C for 2 h (1:100 enzyme:substrate ratio). The sample was then diluted to 2 M urea  
678 using 50 mM HEPES, pH 8.5 and then further digested with trypsin (1:50  
679 enzyme:substrate ratio) overnight at room temperature. After adding TFA to 1% v/v,  
680 the samples were centrifuged at 21,000 xg for 10 min at RT, desalted using Oasis  
681 desalting columns (Waters) and then dried by vacuum centrifugation. Phosphopeptide  
682 enrichment was conducted using titanium dioxide (TiO<sub>2</sub>) beads. Dried peptides were  
683 resuspended in binding buffer (65% AcN, 2% TFA) and supplemented with 1 mM  
684 KH<sub>2</sub>PO<sub>4</sub>, before being added to TiO<sub>2</sub> beads that had been washed twice with washing  
685 buffer (65% AcN, 0.1% TFA). The samples were incubated for 30 min at RT with  
686 constant agitation and then washed twice with washing buffer. The bound  
687 phosphopeptides were eluted with 40 µl elution buffer (50% AcN, 14% NH<sub>4</sub>OH pH~11)  
688 and then dried by vacuum centrifugation. The phosphopeptides were then  
689 resuspended in 50 mM HEPES pH 8.5, acidified by the addition of TFA to ~2% v/v,  
690 desalted using Oasis desalting columns (Waters) and then dried by vacuum  
691 centrifugation.

692

693 *Mass spectrometry data acquisition, processing and analysis*

694

695 Samples were analysed on an Ultimate 3000 ultra-HPLC system (Thermo Fisher  
696 Scientific) and electrosprayed directly into a QExactive mass spectrometer (Thermo  
697 Fisher Scientific). They were initially trapped on a C18 PepMap100 pre-column (300  
698 µm inner diameter x 5 mm, 100Å, Thermo Fisher Scientific) in solvent A (0.1% [vol/vol]  
699 formic acid in water). The peptides were then separated on an in-house packed  
700 analytical column (75 µm inner diameter x 50cm packed with ReproSil-Pur 120 C18-  
701 AQ, 1.9 µm, 120 Å, Dr. Maisch GmbH) using a 2h linear 15%-35% [vol/vol] acetonitrile  
702 gradient and a flow rate of 200 nl/min. Full-scan mass spectra were acquired in the  
703 Orbitrap (scan range 350-1500 m/z, resolution 70000, AGC target 3×10<sup>6</sup>, maximum  
704 injection time 50 ms) in a data-dependent mode. After the mass spectrum scans, the  
705 top 20 most intense peaks were selected for higher-energy collisional dissociation

706 fragmentation at 30% of normalized collision energy. Higher-energy collisional  
707 dissociation fragmentation spectra were also acquired in the Orbitrap (resolution  
708 17500, AGC target  $5 \times 10^4$ , maximum injection time 120 ms) with first fixed mass at 180  
709 m/z. Peptide identification and quantitation was then performed using MaxQuant  
710 (v1.6.3.4). Data was searched against the mouse Uniprot database (January 2017)  
711 and a list of common contaminants provided by the software. The search parameters  
712 for the Andromeda search engine were: full tryptic specificity, allowing two missed  
713 cleavage sites, fixed modification was set to carbamidomethyl (C) and the variable  
714 modification to phosphorylation (STY), acetylation (protein N-terminus) and oxidation  
715 (M). Match between runs was applied. All other settings were set to default, leading to  
716 a 1% FDR for protein identification. For pathway analysis, significant differential  
717 protein lists were analysed using Enrichr (Kuleshov et al., 2016) or g:Profiler  
718 (Raudvere et al., 2019) and then GO terms reduced and visualised using Revigo  
719 (Supek et al., 2011). Protein-protein interaction (PPI) mapping was performed using  
720 STRING (Szklarczyk et al., 2019).

721

## 722 QUANTIFICATION AND STATISTICAL ANALYSIS

723

724 Circadian analysis was conducted using the Clocklab software package (Actimetrics  
725 Wilmette, IL, USA). Circadian period (Tau) was calculated using a Chi-squared  
726 periodogram. The average daily active period (Alpha) is represented in degrees and  
727 is corrected for individual circadian period. Bout analysis was conducted using an  
728 activity threshold of 4 counts per minute with a maximum permissible gap of 3 minutes.  
729 Data visualization and statistical analysis was conducted using GraphPad Prism  
730 (Version 8, La Jolla, CA) or RStudio (Version 1.1.447, Boston, MA). All data are  
731 expressed as mean + or  $\pm$  SEM, and n represents the number of independent animals  
732 or replicates per group, as detailed in each figure legend. For comparisons between  
733 two groups only, a two-tailed Student's t-test was applied. For multiple comparisons a  
734 two-way ANOVA with Sidak's multiple comparisons correction was used. A p value of  
735  $<0.05$  was taken to be statistically significant. For phosphopeptide analysis following  
736 the light/dark cycle advance,  $\log_2(\text{abundance})$  values were used for statistical testing.  
737 Phosphopeptide differences between groups were assessed using multiple two-tailed  
738 unpaired student's t tests followed by FDR correction using the Benjamini, Krieger and  
739 Yekutieli two-stage step up method (Q = 0.2). A Q value of  $> 0.2$  was considered

740 statistically significant. For phosphopeptide analysis following sleep deprivation,  
741 differences between groups were assessed by log<sub>2</sub> fold change. A log<sub>2</sub> fold change of  
742 > 0.5 or < -0.5 was considered differential. The exact test used is specified in the  
743 corresponding figure legend.

744

## 745 REFERENCES

746

747 Borbély, A.A. (1982). A Two Process Model of Sleep Regulation. *Human*

748 *Neurobiology* 1, 195–204.

749 Borbély, A.A., Daan, S., Wirz-Justice, A., and Deboer, T. (2016). The two-process  
750 model of sleep regulation: a reappraisal. *Journal of Sleep Research* 25, 131–143.

751 Brown, J.C., Petersen, A., Zhong, L., Himelright, M.L., Murphy, J.A., Walikonis, R.S.,  
752 and Gerges, N.Z. (2016). Bidirectional regulation of synaptic transmission by

753 BRAG1/IQSEC2 and its requirement in long-term depression. *Nature*

754 *Communications* 7.

755 Brüning, F., Noya, S.B., Bange, T., Koutsouli, S., Rudolph, J.D., Tyagarajan, S.K.,

756 Cox, J., Mann, M., Brown, S.A., and Robles, M.S. (2019). Sleep-wake cycles drive  
757 daily dynamics of synaptic phosphorylation. *Science* 366.

758 Bulat, V., Rast, M., and Pielage, J. (2014). Presynaptic CK2 promotes synapse  
759 organization and stability by targeting Ankyrin2. *Journal of Cell Biology* 204, 77–94.

760 Carlisle, H.J., Luong, T.N., Medina-Marino, A., Schenker, L., Khorosheva, E.,

761 Indersmitten, T., Gunapala, K.M., Steele, A.D., O'Dell, T.J., Patterson, P.H., et al.

762 (2011). Deletion of densin-180 results in abnormal behaviors associated with mental

763 illness and reduces mGluR5 and DISC1 in the postsynaptic density fraction. *Journal*

764 *of Neuroscience* 31, 16194–16207.

765 Choi, C.S.W., Souza, I.A., Sanchez-Arias, J.C., Zamponi, G.W., Arbour, L.T., and

766 Swayne, L.A. (2019). Ankyrin B and Ankyrin B variants differentially modulate

767 intracellular and surface Cav2.1 levels. *Molecular Brain* 12.

768 Clifton, N.E., Trent, S., Thomas, K.L., and Hall, J. (2019). Regulation and Function of

769 Activity-Dependent Homer in Synaptic Plasticity. *Molecular Neuropsychiatry* 5, 147–

770 161.

771 Darling, N.J., Toth, R., Arthur, J.S.C., and Clark, K. (2016). Inhibition of SIK2 and

772 SIK3 during differentiation enhances the anti-inflammatory phenotype of

773 macrophages. *Biochemical Journal*.

774 Dessauer, C.W., Watts, V.J., Ostrom, R.S., Conti, M., Dove, S., and Seifert, R.  
775 (2017). International union of basic and clinical pharmacology. Cl. structures and  
776 small molecule modulators of mammalian adenylyl cyclases. *Pharmacological*  
777 *Reviews* 69, 96–139.

778 Diering, G.H., Nirujogi, R.S., Roth, R.H., Worley, P.F., Pandey, A., and Huganir, R.L.  
779 (2017). Homer1a drives homeostatic scaling-down of excitatory synapses during  
780 sleep. *Science* 355, 511–515.

781 Dosemeci, A., Makusky, A.J., Jankowska-Stephens, E., Yang, X., Slotta, D.J., and  
782 Markey, S.P. (2007). Composition of the synaptic PSD-95 complex. *Molecular and*  
783 *Cellular Proteomics* 6, 1749–1760.

784 Foster, R.G., Hughes, S., and Peirson, S.N. (2020). Circadian Photoentrainment in  
785 Mice and Humans. *Biology* 9, 1–45.

786 Funato, H., Miyoshi, C., Fujiyama, T., Kanda, T., Sato, M., Wang, Z., Ma, J., Nakane,  
787 S., Tomita, J., Ikkyu, A., et al. (2016). Forward-genetics analysis of sleep in randomly  
788 mutagenized mice. *Nature* 539, 378–383.

789 Goldsmith, C.S., and Bell-Pedersen, D. (2013). Diverse roles for MAPK signaling in  
790 Circadian clocks. In *Advances in Genetics*, (Academic Press Inc.), pp. 1–39.

791 Golombek, D.A., and Rosenstein, R.E. (2010). Physiology of Circadian Entrainment.  
792 *Physiological Reviews* 90, 1063–1102.

793 Gundelfinger, E.D., Reissner, C., and Garner, C.C. (2016). Role of Bassoon and  
794 Piccolo in Assembly and Molecular Organization of the Active Zone. *Frontiers in*  
795 *Synaptic Neuroscience* 7.

796 Hastings, M.H., Maywood, E.S., and Brancaccio, M. (2018). Generation of circadian  
797 rhythms in the suprachiasmatic nucleus. *Nature Reviews Neuroscience* 19, 453–  
798 469.

799 Honda, T., Fujiyama, T., Miyoshi, C., Ikkyu, A., Hotta-Hirashima, N., Kanno, S.,  
800 Mizuno, S., Sugiyama, F., Takahashi, S., Funato, H., et al. (2018). A single  
801 phosphorylation site of SIK3 regulates daily sleep amounts and sleep need in mice.  
802 *Proceedings of the National Academy of Sciences of the United States of America*  
803 115, 10458–10463.

804 Jagannath, A., Butler, R., Godinho, S.I.H., Couch, Y., Brown, L.A., Vasudevan, S.R.,  
805 Flanagan, K.C., Anthony, D., Churchill, G.C., Wood, M.J.A., et al. (2013). The  
806 CRT1-SIK1 Pathway Regulates Entrainment of the Circadian Clock. *Cell* 154,  
807 1100–1111.

808 Jiao, Y., Jalan-Sakrikar, N., Robison, A.J., Baucum, A.J., Bass, M.A., and Colbran,  
809 R.J. (2011). Characterization of a central Ca<sup>2+</sup>/calmodulin-dependent protein kinase  
810 II $\alpha$ / $\beta$  binding domain in densin that selectively modulates glutamate receptor subunit  
811 phosphorylation. *Journal of Biological Chemistry* 286, 24806–24818.

812 Kamp, M.A., Krieger, A., Henry, M., Hescheler, J., Weiergräber, M., and Schneider,  
813 T. (2005). Presynaptic “Cav2.3-containing” E-type Ca<sup>2+</sup> channels share dual roles  
814 during neurotransmitter release. *European Journal of Neuroscience* 21, 1617–1625.

815 Koch, I., Schwarz, H., Beuchle, D., Goellner, B., Langegger, M., and Aberle, H.  
816 (2008). Drosophila Ankyrin 2 Is Required for Synaptic Stability. *Neuron* 58, 210–222.

817 Kuleshov, M. V., Jones, M.R., Rouillard, A.D., Fernandez, N.F., Duan, Q., Wang, Z.,  
818 Koplev, S., Jenkins, S.L., Jagodnik, K.M., Lachmann, A., et al. (2016). Enrichr: a  
819 comprehensive gene set enrichment analysis web server 2016 update. *Nucleic Acids*  
820 *Research* 44, W90–W97.

821 Legates, T.A., Fernandez, D.C., and Hattar, S. (2014). Light as a central modulator  
822 of circadian rhythms, sleep and affect. *Nature Reviews Neuroscience* 15, 443–454.

823 Maret, S., Dorsaz, S., Gurcel, L., Pradervand, S., Petit, B., Pfister, C., Hagenbuchle,  
824 O., O’Hara, B.F., Franken, P., and Tafti, M. (2007). Homer1a is a core brain  
825 molecular correlate of sleep loss. *Proceedings of the National Academy of Sciences*  
826 *of the United States of America* 104, 20090–20095.

827 Martin, S.C., Monroe, S.K., and Diering, G.H. (2019). Homer1a and mGluR1/5  
828 Signaling in Homeostatic Sleep Drive and Output. *The Yale Journal of Biology and*  
829 *Medicine* 92, 93–101.

830 Mieda, M. (2019). The central circadian clock of the suprachiasmatic nucleus as an  
831 ensemble of multiple oscillatory neurons. *Neuroscience Research*.

832 Mikhail, C., Vaucher, A., Jimenez, S., and Tafti, M. (2017). ERK signaling pathway  
833 regulates sleep duration through activity-induced gene expression during  
834 wakefulness. *Science Signaling* 10.

835 Ode, K.L., and Ueda, H.R. (2020). Phosphorylation Hypothesis of Sleep. *Frontiers in*  
836 *Psychology* 0, 2700.

837 O’Neill, J.S., Maywood, E.S., Chesham, J.E., Takahashi, J.S., and Hastings, M.H.  
838 (2008). cAMP-dependent signaling as a core component of the mammalian circadian  
839 pacemaker. *Science* 320, 949–953.

840 Di Paolo, G., Sankaranarayanan, S., Wenk, M.R., Daniell, L., Perucco, E.,  
841 Caldarone, B.J., Flavell, R., Picciotto, M.R., Ryan, T.A., Cremona, O., et al. (2002).

842 Decreased synaptic vesicle recycling efficiency and cognitive deficits in amphiphysin  
843 1 knockout mice. *Neuron* 33, 789–804.

844 Park, M., Miyoshi, C., Fujiyama, T., Kakizaki, M., Ikkyu, A., Honda, T., Choi, J.,  
845 Asano, F., Mizuno, S., Takahashi, S., et al. (2020). Loss of the conserved PKA sites  
846 of SIK1 and SIK2 increases sleep need. *Scientific Reports* 10, 1–14.

847 Rasmussen, A.H., Rasmussen, H.B., and Silaharoglu, A. (2017). The DLGAP  
848 family: Neuronal expression, function and role in brain disorders. *Molecular Brain* 10.  
849 Raudvere, U., Kolberg, L., Kuzmin, I., Arak, T., Adler, P., Peterson, H., and Vilo, J.  
850 (2019). g:Profiler: a web server for functional enrichment analysis and conversions of  
851 gene lists (2019 update). *Nucleic Acids Research* 47, W191–W198.

852 Reppert, S.M., and Weaver, D.R. (2002). Coordination of circadian timing in  
853 mammals. *Nature* 418, 935–941.

854 Sakagami, H., Sanda, M., Fukaya, M., Miyazaki, T., Sukegawa, J., Yanagisawa, T.,  
855 Suzuki, T., Fukunaga, K., Watanabe, M., and Kondo, H. (2008). IQ-ArfGEF/BRAG1  
856 is a guanine nucleotide exchange factor for Arf6 that interacts with PSD-95 at  
857 postsynaptic density of excitatory synapses. *Neuroscience Research* 60, 199–212.

858 Sanderson, J.L., and Dell'Acqua, M.L. (2011). AKAP signaling complexes in  
859 regulation of excitatory synaptic plasticity. *Neuroscientist* 17, 321–336.

860 Scammell, T.E., Arrigoni, E., and Lipton, J.O. (2017). Neural Circuitry of  
861 Wakefulness and Sleep. *Neuron* 93, 747–765.

862 Siwek, M.E., Müller, R., Henseler, C., Broich, K., Papazoglou, A., and Weiergräber,  
863 M. (2014). The CaV2.3 R-Type Voltage-Gated Ca<sup>2+</sup> Channel in Mouse Sleep  
864 Architecture. *Sleep* 37, 881–892.

865 Supek, F., Bošnjak, M., Škunca, N., and Šmuc, T. (2011). REVIGO Summarizes and  
866 Visualizes Long Lists of Gene Ontology Terms. *PLoS ONE* 6, e21800.

867 Szklarczyk, D., Gable, A.L., Lyon, D., Junge, A., Wyder, S., Huerta-Cepas, J.,  
868 Simonovic, M., Doncheva, N.T., Morris, J.H., Bork, P., et al. (2019). STRING v11:  
869 Protein-protein association networks with increased coverage, supporting functional  
870 discovery in genome-wide experimental datasets. *Nucleic Acids Research*.  
871 Takahashi, J.S. (2017). Transcriptional architecture of the mammalian circadian  
872 clock. *Nature Reviews Genetics* 18, 164–179.

873 Tatsuki, F., Sunagawa, G.A.A., Shi, S., Susaki, E.A.A., Yukinaga, H., Perrin, D.,  
874 Sumiyama, K., Ukai-Tadenuma, M., Fujishima, H., Ohno, R. ichiro, et al. (2016).



875 Involvement of Ca<sup>2+</sup>-Dependent Hyperpolarization in Sleep Duration in Mammals.  
876 *Neuron* 90, 70–85.

877 Um, J.W. (2017). Synaptic functions of the IQSEC family of ADP-ribosylation factor  
878 guanine nucleotide exchange factors. *Neuroscience Research* 116, 54–59.

879 Wang, Z., Ma, J., Miyoshi, C., Li, Y., Sato, M., Ogawa, Y., Lou, T., Ma, C., Gao, X.,  
880 Lee, C., et al. (2018). Quantitative phosphoproteomic analysis of the molecular  
881 substrates of sleep need. *Nature* 558, 435–439.

882 Watson, G., Ronai, Z., and Lau, E. (2017). ATF2, a paradigm of the multifaceted  
883 regulation of transcription factors in biology and disease. *Pharmacological Research*  
884 119, 347–357.

885 Yoshitane, H., Honma, S., Imamura, K., Nakajima, H., Nishide, S.Y., Ono, D., Kiyota,  
886 H., Shinozaki, N., Matsuki, H., Wada, N., et al. (2012). JNK regulates the photic  
887 response of the mammalian circadian clock. *EMBO Reports* 13, 455–461.

888 Zhang, Q., Gao, X., Li, C., Feliciano, C., Wang, D., Zhou, D., Mei, Y., Monteiro, P.,  
889 Anand, M., Itohara, S., et al. (2016). Impaired dendritic development and memory in  
890 sorbs2 knock-out mice. *Journal of Neuroscience* 36, 2247–2260.

891

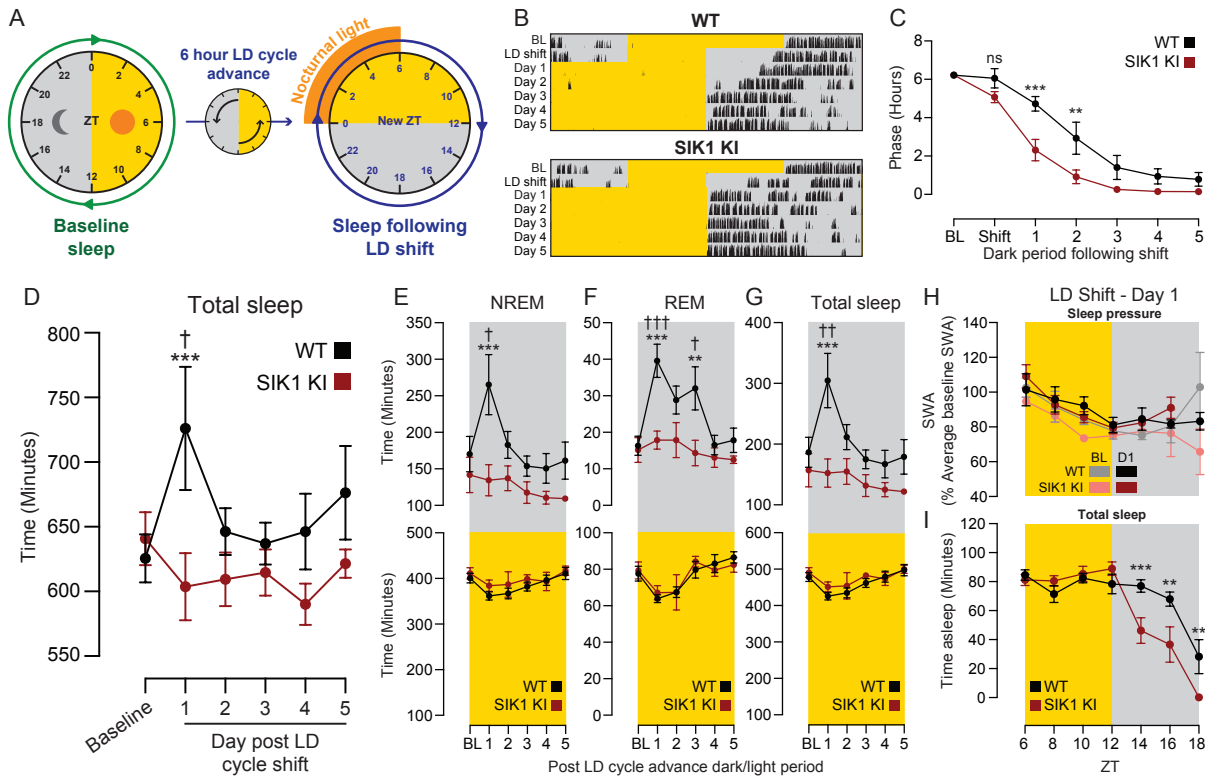

892 **Figure 1. The light-inducible kinase SIK1 regulates the induction of sleep after**  
 893 **nocturnal light exposure in a manner independent from sleep pressure. WT and**  
 894 **SIK1 KI animals underwent surgery to implant EEG and EMG electrodes and then**  
 895 **were housed under a 12:12 LD cycle with continuous sleep recording. (A) Baseline**  
 896 **sleep (BL) was recorded, the light/dark (LD) cycle advanced by 6 hours, and sleep**  
 897 **and running wheel activity in the days following the LD cycle shift measured. (B)**  
 898 **Representative actograms of WT and SIK1 KI animals with baseline, LD cycle shift**  
 899 **and days following this shift indicated. (C) Quantification of phase confirmed the SIK1**  
 900 **KI rapid entrainment phenotype in the sleep study cohort. (D) Quantification of total**  
 901 **daily sleep time found that WT animals slept significantly more in the first full day after**  
 902 **the LD cycle shift, in comparison to the baseline day, whereas SIK1 KI animals did not**  
 903 **display an increase in sleep on any day following the LD cycle shift. In comparison to**  
 904 **WT animals, SIK1 KI mice did not have increased (E) NREM, (F) REM or (G) total**  
 905 **sleep time in the dark period (grey box) of first full day, or any of the subsequent days,**  
 906 **following the LD cycle shift. There was no difference in any of the above sleep**  
 907 **measures between the genotypes during the light period (yellow box) following the LD**  
 908 **cycle shift. There was no difference in (H) the levels of SWA or (I) time spent asleep**  
 909 **(both calculated in 2-hour bins) in the 6 hours prior to dark onset of shift day 1 (see B),**

910 however (I) SIK1 KI animals spent significantly less time asleep than WT mice 2, 4  
 911 and 6 hours after dark onset of shift day 1. Data are mean  $\pm$  SEM, n = 5-6. Statistical  
 912 analysis was conducted by two-way ANOVA with Sidak's correction. ns P > 0.05, \*\* P  
 913 < 0.01, \*\*\* P < 0.001.

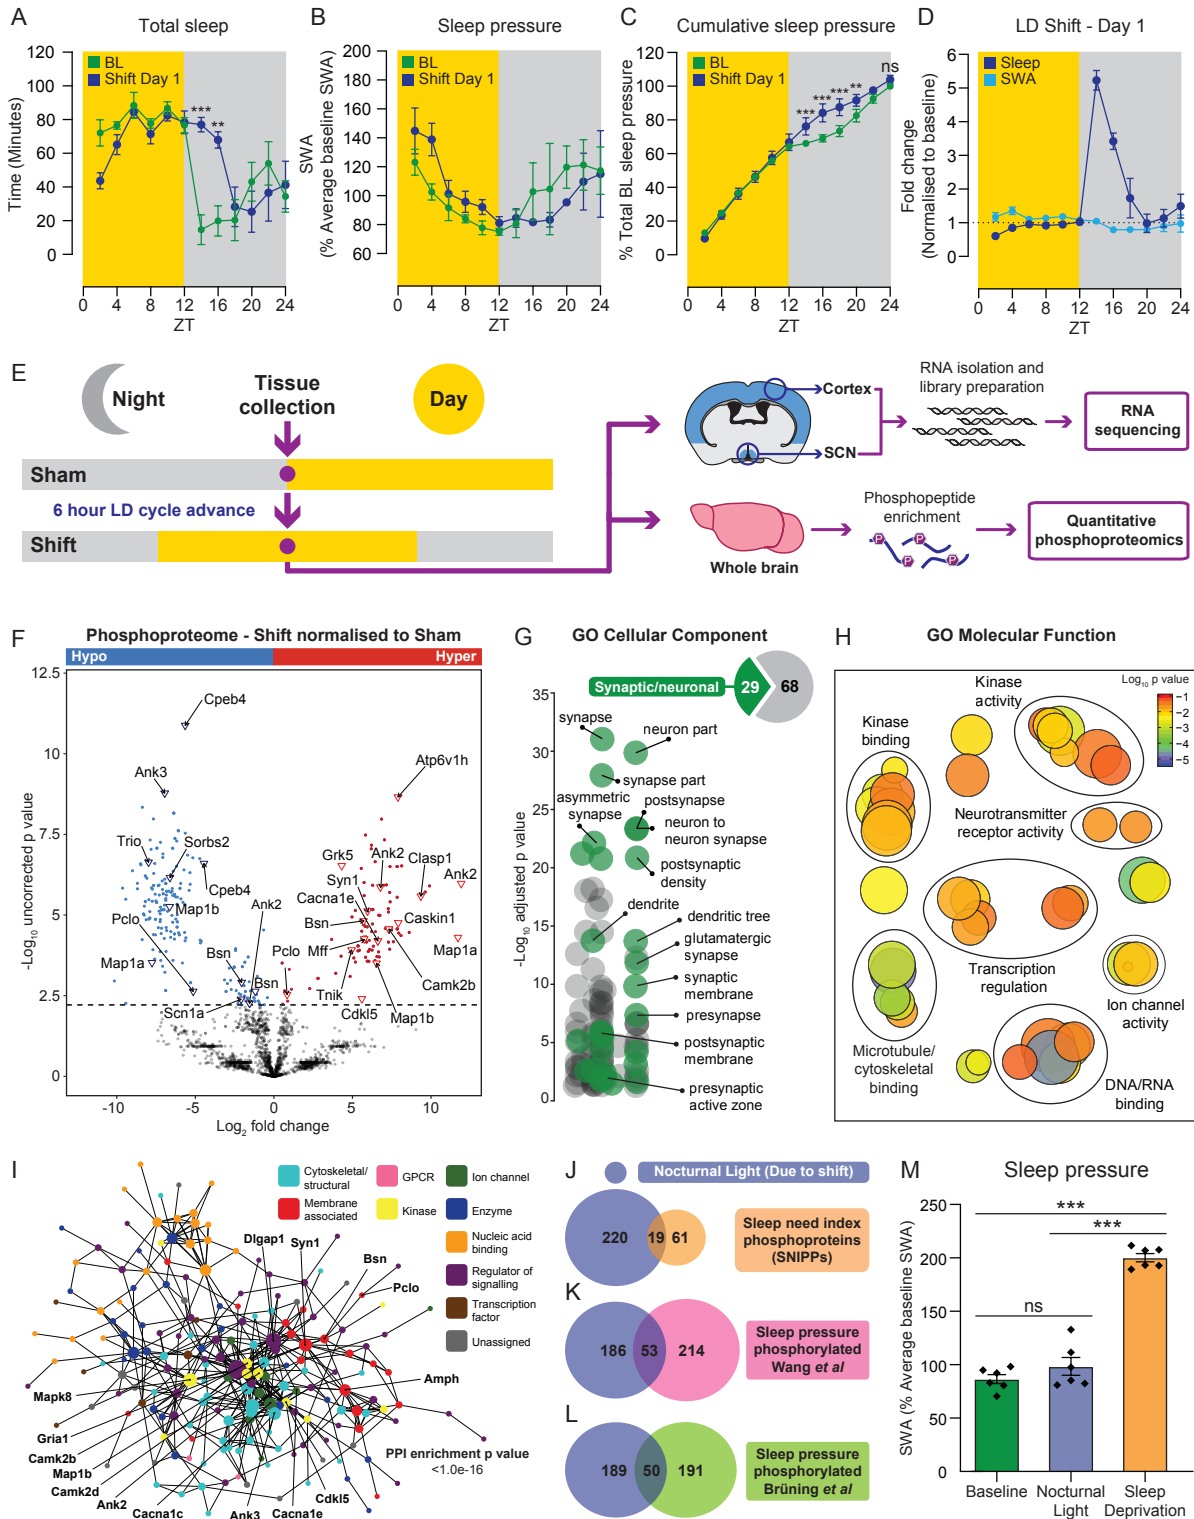

914 **Figure 2. Nocturnal light driven remodelling of the brain phosphoproteome**  
 915 **mirrors sleep deprivation, yet occurs independently from sleep need.** (A) Total  
 916 sleep time and (B) average slow wave activity (SWA) in 2-hour bins for the baseline  
 917 day (green) and first full day after the light/dark cycle advance (blue – Shift Day 1) (C)  
 918 Cumulative sleep pressure in 2-hour bins, as a percentage total baseline sleep  
 919 pressure, on the baseline day and shift day 1. (D) Fold change of sleep (dark blue)  
 920 and SWA (light blue) between shift day 1 and the baseline day. (E) SCN and cortex  
 921 (RNA sequencing), and whole brain (Quantitative phosphoproteomics) samples were  
 922 collected either 6 hours into a 6-hour light advance (Shift) or at the same relative time,  
 923 but without a light shift (Sham). (F) Mass spectrometry analysis of shift and sham WT  
 924 samples following phosphopeptide enrichment. (G) GO cellular component, (H) GO  
 925 molecular function pathway analysis, and (I) STRING protein-protein interaction (PPI)  
 926 analysis of significant phosphopeptides. The overlap between our nocturnal light  
 927 phosphoproteome and (J) the SNIPPs, or all sleep pressure hyperphosphorylated  
 928 proteins detailed in (K) Wang *et al.* or (L) Brüning *et al.* (M) SWA 6 hours into the light  
 929 period on the baseline day, on the first day after the light/dark cycle shift, or after sleep  
 930 deprivation. Data are (A-D and M) mean  $\pm$  SEM or (E) mean only. Statistical analysis  
 931 was conducted by (A-D) two-way ANOVA with Sidak's correction, by multiple student's  
 932 two-tailed t-tests with a two-stage step up FDR correction, or by (M) one-way ANOVA  
 933 with Tukey's correction. n = 3-6. ns P > 0.05, \*\* P < 0.01, \*\*\* P < 0.001.

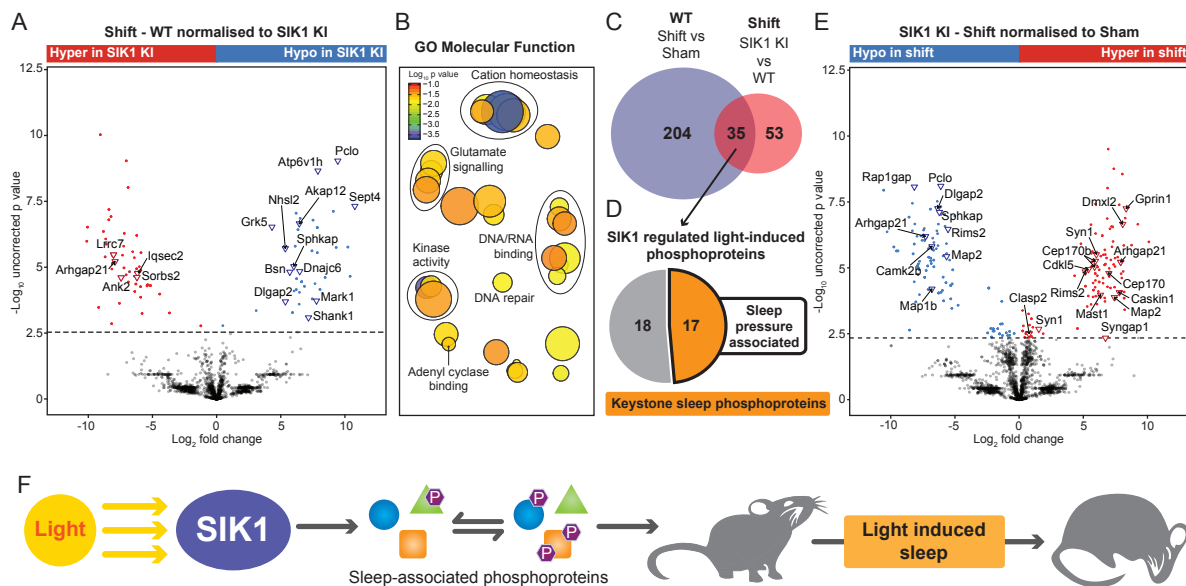

934

935 **Figure 3. SIK1 induced changes in the brain phosphoproteome are necessary**  
 936 **and sufficient to induce sleep following nocturnal light exposure.** (A)  
 937 Phosphopeptide enrichment analysis of whole brain WT and SIK1 KI shift samples.  
 938 (B) GO molecular function pathway analysis of differential phosphopeptides. (C)  
 939 Overlap between the WT shift and SIK1 KI differential phosphoproteins, with (D) 17  
 940 being previously sleep pressure associated (Termed here keystone sleep  
 941 phosphoproteins). (E) Phosphopeptide enrichment analysis of SIK1 KI shift vs sham  
 942 samples. (F) SIK1 controls a subset of the brain phosphoproteome to induce sleep in  
 943 response to nocturnal light. (A, E) Mean only, multiple student's two-tailed t-tests with  
 944 a two-stage step up FDR correction (Q = 0.2).  
 945

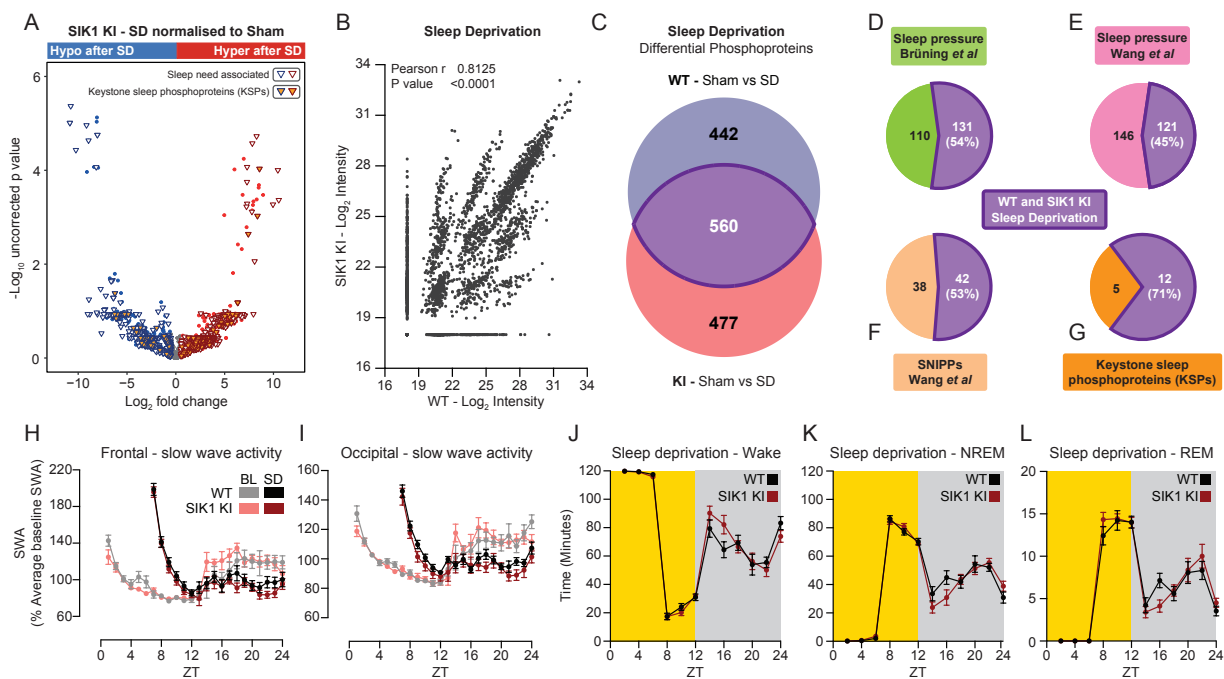

946 **Figure 4. SIK1 KI animals correctly phosphorylate synaptic phosphoproteins**  
 947 **following 6 hours of sleep deprivation, which results in normal sleep and slow**  
 948 **wave activity architecture.** WT and SIK1 KI animals were housed under a 12:12 LD  
 949 cycle with continuous sleep recording. Sleep deprivation was then conducted from  
 950 ZT0 – ZT6. Mass spectrometry following phosphopeptide enrichment was conducted  
 951 on WT and SIK1KI whole brain samples following SD. (A) Volcano plot of differential  
 952 phosphopeptides (blue – hypophosphorylated after SD; red – hyperphosphorylated  
 953 after SD) in SIK1 KI mice following SD. All previously sleep need associated  
 954 phosphoproteins (open triangles) and keystone sleep phosphoproteins (orange filled  
 955 triangles – as detailed in Figure 3D) are highlighted. (B) Correlation analysis of

956 phosphopeptide abundance between WT and SIK1 KI SD samples. (C) Overlap of WT  
957 and SIK1 KI differential phosphopeptides with the same directionality. The number of  
958 WT and SIK1 KI SD differential phosphopeptides that are present in (D) the sleep  
959 pressure associated phosphoproteins from Brüning *et al.* or (E) Wang *et al.*, (F)  
960 SNIPPs from Wang *et al.* and (G) the keystone sleep phosphopeptides. There was no  
961 difference in the levels of (H) frontal and (I) occipital SWA under baseline conditions  
962 (BL), or following SD, between the genotypes, and the amount of (J) wake, (K) NREM  
963 and (L) REM, in 2-hour bins, did not differ between WT and SIK1 KI animals following  
964 SD. Data are (A,B) mean only or (H-L) mean  $\pm$  SEM or. n = (H-L) 12-14 and (A-G) 3.  
965 For (H-L) statistical analysis was conducted by two-way ANOVA with Sidak's multiple  
966 comparisons correction. ns P > 0.05.  
967

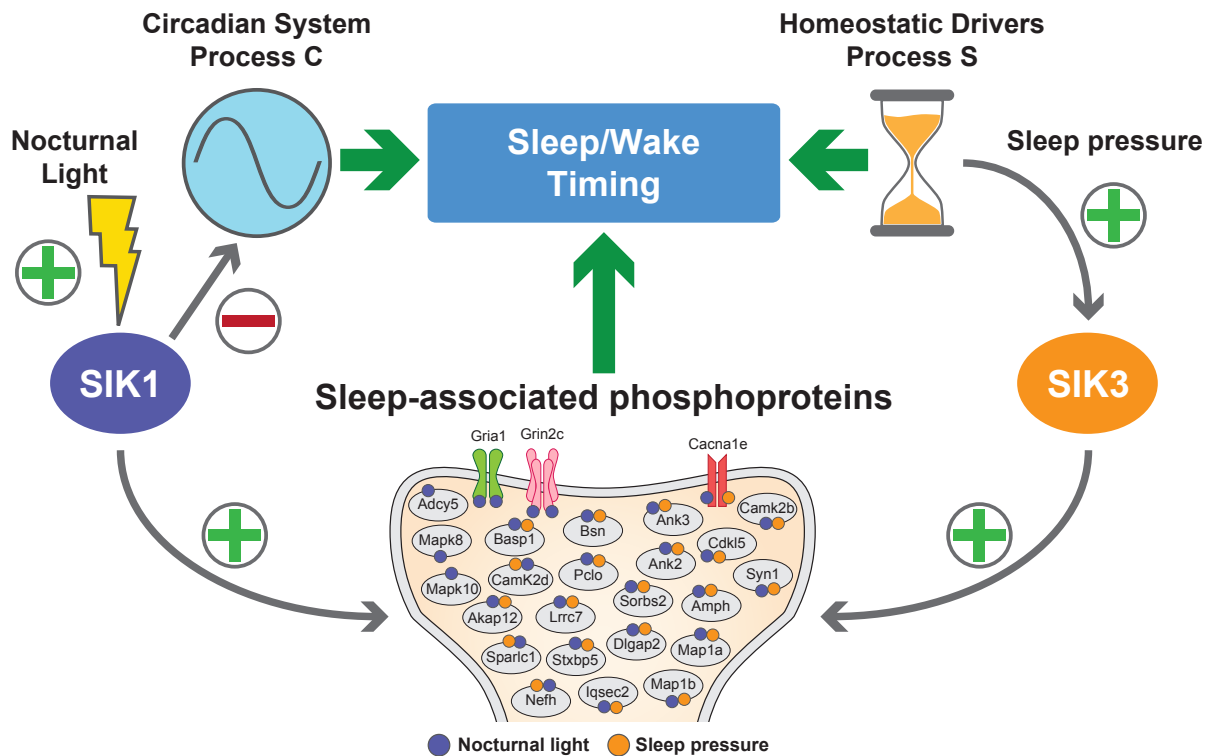

968 **Figure 5. The salt-inducible kinases SIK1 and SIK3 both induce sleep by**  
969 **regulating the phosphorylation status of a core group of synaptic proteins, but**  
970 **under entirely different contexts.** We propose a model whereby SIK1 and SIK3, two  
971 members of the same kinase family, both induce sleep by regulating the  
972 phosphorylation of a core group of synaptic phosphoproteins. Crucially however, their  
973 activity is induced by entirely different stimuli, with SIK1 activity dependent on  
974 nocturnal light and SIK3 activity dependent on sleep pressure. This model advances



975 our basic understanding of the regulatory mechanisms underpinning sleep by  
976 suggesting that Process S and Process C, the fundamental components of the two-  
977 process model of sleep, converge upon the synaptic phosphoproteome through the  
978 action of the salt-inducible kinases thereby providing a molecular mechanism by which  
979 these systems interact. Furthermore, this demonstrates how these kinases have  
980 evolved to perform distinct – but complementary – roles, to buffer the sleep and  
981 circadian systems in response to environmental and physiological challenge.

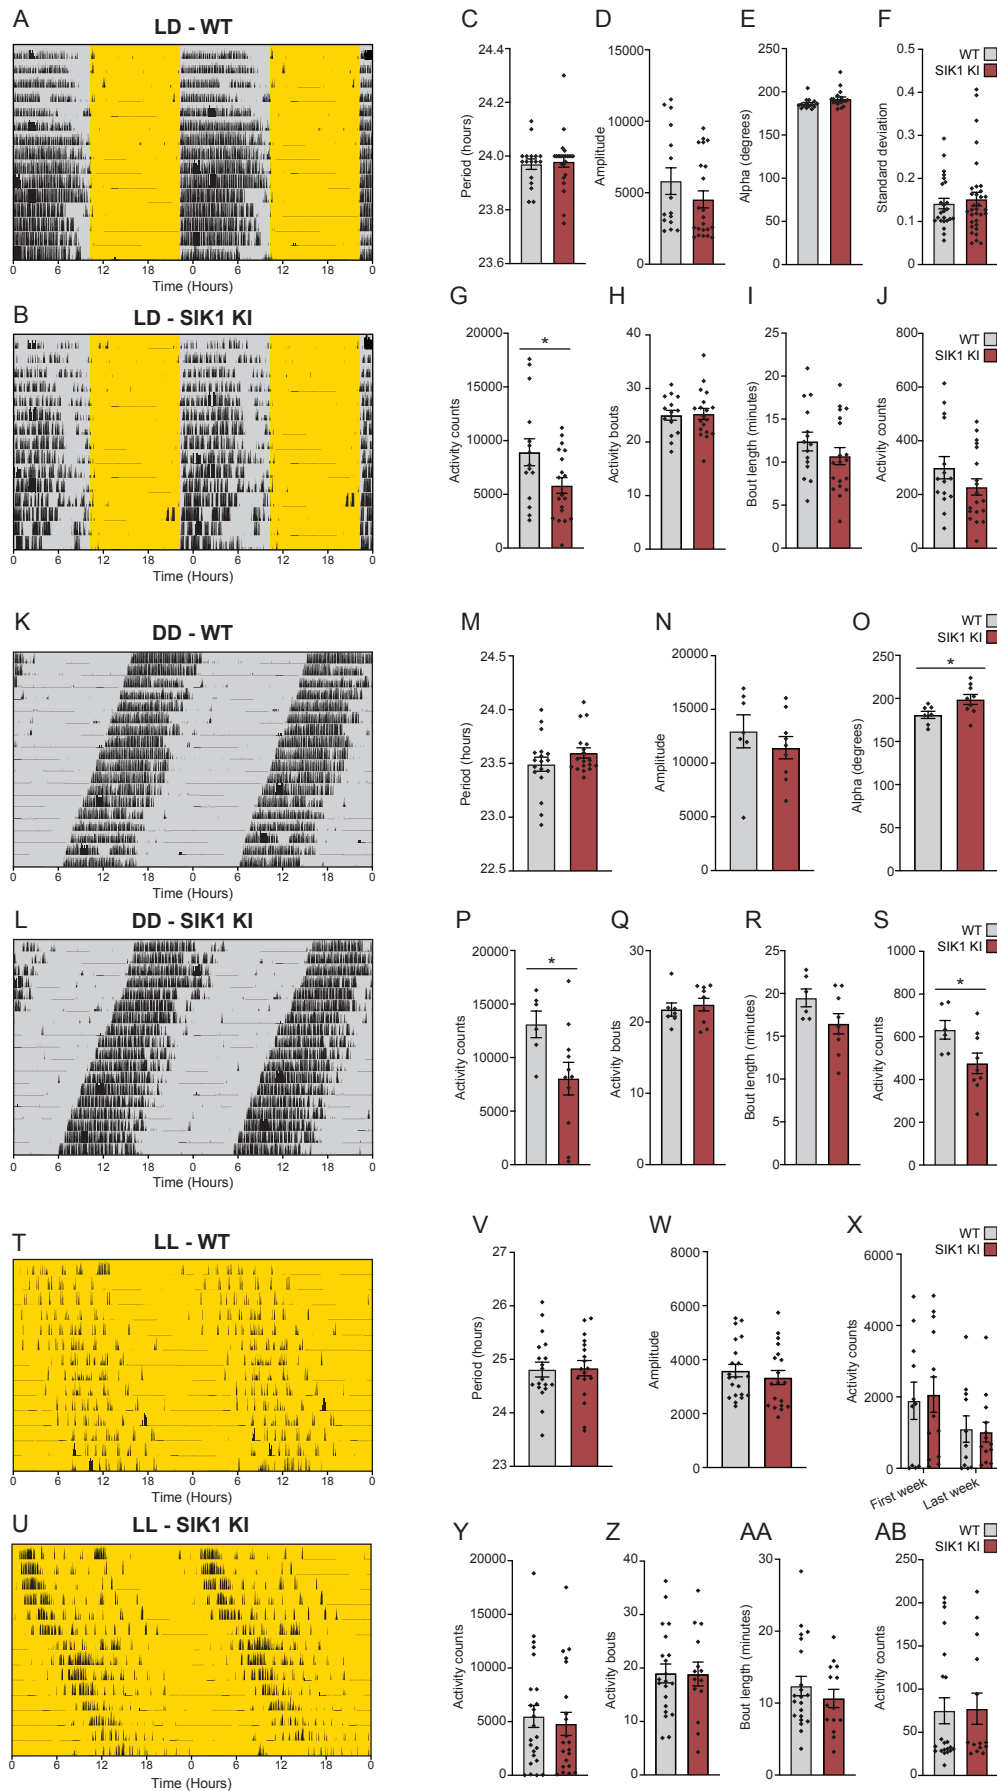

983 **Figure S1. Related to Figure 1. SIK1 KI animals have normal circadian activity**  
984 **and behaviour under a 12:12 light/dark cycle and under constant conditions.**  
985 Actograms from (A) WT and (B) SIK1 KI mice under a 12:12 LD cycle. Lights on -  
986 yellow, lights off - grey, activity - black. Each horizontal line represents 24 hours double  
987 plotted. (C) LD circadian period, (D) periodicity amplitude, (E) active period length –  
988 alpha, (F) standard deviation of activity onset, (G) average total daily wheel  
989 revolutions, (H) average activity bouts per day, (I) average bout length and (J) average  
990 wheel revolutions per activity bout. Actograms from (K) WT and (L) SIK1 KI mice in  
991 DD. (M) DD circadian period, (N) periodicity amplitude, (O) active period length, (P)  
992 average total daily wheel revolutions, (Q) average activity bouts per day, (R) average  
993 bout length and (S) average wheel revolutions per activity bout. Actograms from (T)  
994 WT and (U) SIK1 KI mice housed under constant light (LL). (V) LL circadian period,  
995 (W) periodicity amplitude, (X) average total daily wheel revolutions in the first week  
996 under LL and the final week under LL, (Y) average total daily wheel revolutions over  
997 the entire LL period, (Z) average number of activity bouts per day, (AA) average bout  
998 length and (AB) average number of wheel revolutions per activity bout. Data are mean  
999  $\pm$  SEM, n = 13-33 (LD), 6-18 (DD) or 7-24 (LL). Statistical analysis was conducted by  
1000 two-tailed student's t-test. ns  $P > 0.05$ , \*  $P < 0.05$ .

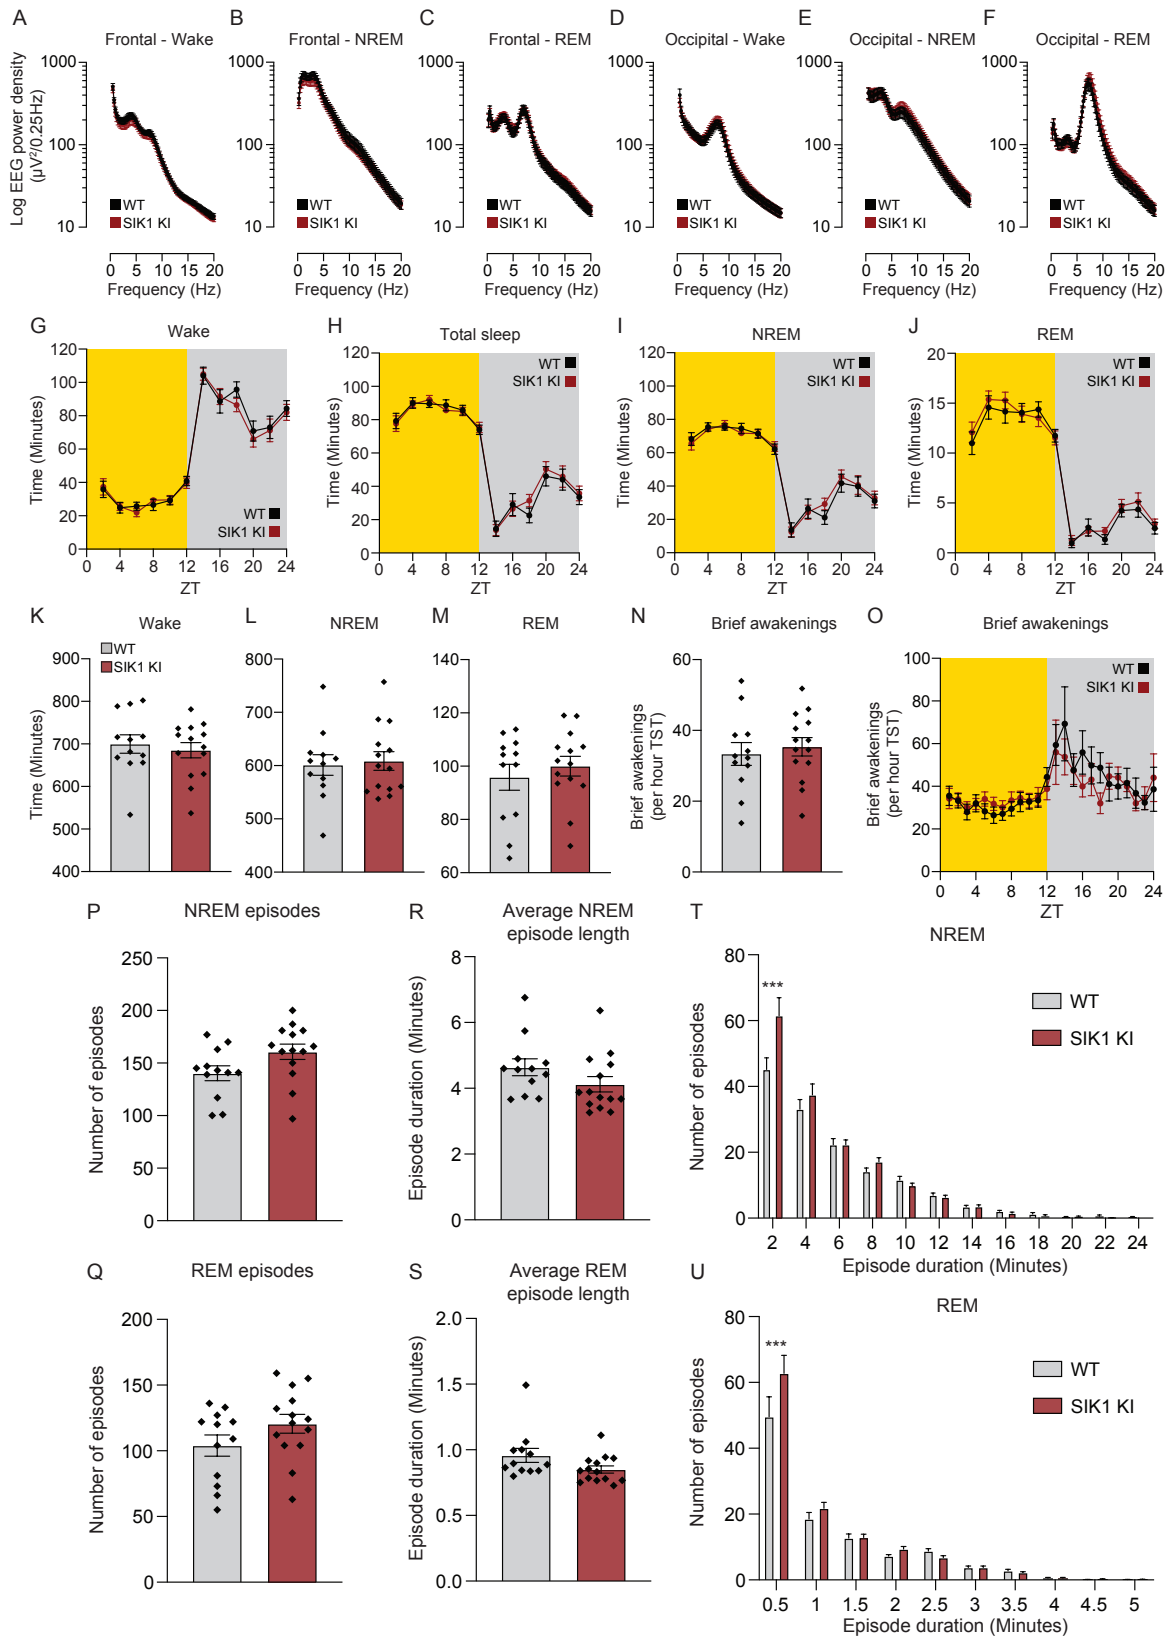

1001 **Figure S2. Related to Figure 1. SIK1 KI animals have normal sleep architecture**  
 1002 **under stable entrainment.** WT and SIK1 KI animals were housed under a 12:12 LD  
 1003 cycle with continuous sleep recording. Baseline average frontal EEG spectra during

1004 (A) wake, (B) NREM and (C) REM. Average occipital EEG spectra during (D) wake,  
1005 (E) NREM and (F) REM. (G) Wake, (H) total sleep, (I) NREM and (J) REM in 2-hour  
1006 bins, and (K) wake, (L) NREM and (M) REM over the entire baseline day. Brief  
1007 awakenings per total hour sleep time (N) over the entire baseline day or (O) in 1-  
1008 hour bins. Total (P) NREM and (Q) REM sleep episodes. Average (R) NREM and (S)  
1009 REM episode duration. Histogram analysis of (T) NREM and (U) REM episode  
1010 duration. Data are (A-S) Mean  $\pm$  SEM or (T,U) mean + SEM. n = 12-14. Statistical  
1011 analysis was conducted by (A-J, O, T, U) two-way ANOVA with Sidak's correction or  
1012 by (K-N, P-S) two-tailed student's t-test. ns P > 0.05, \*\*\* P < 0.001.

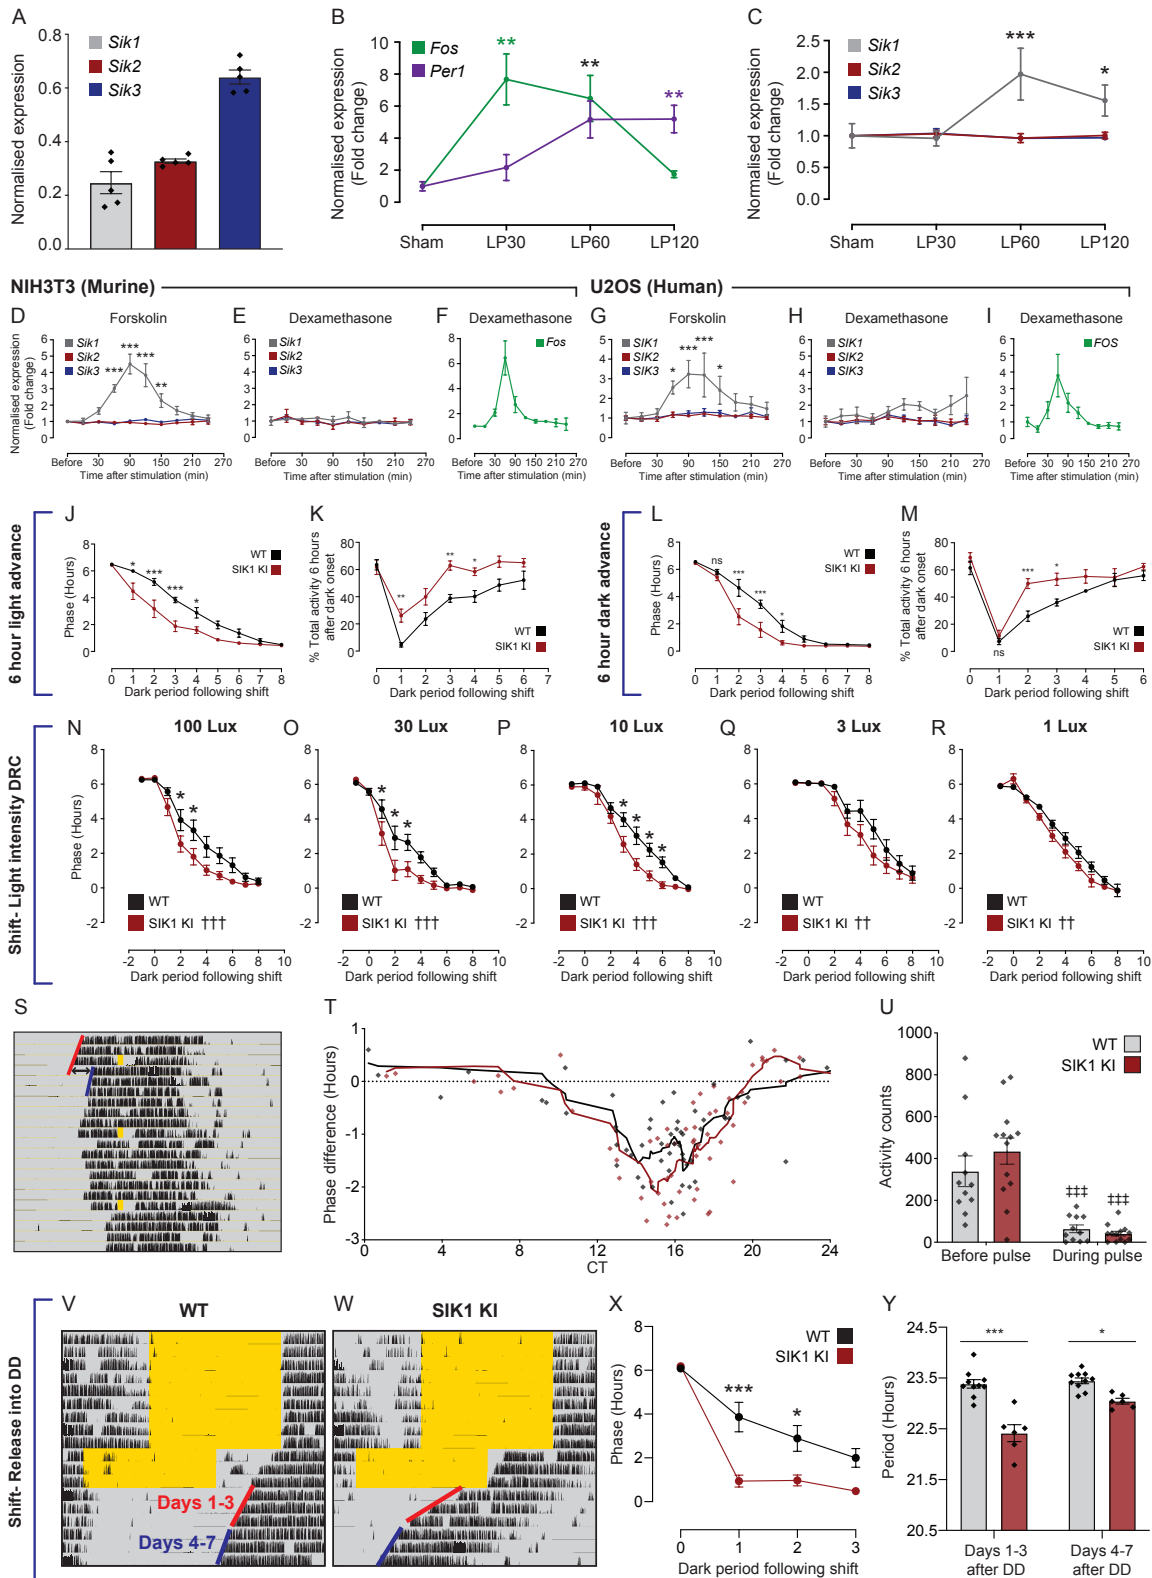

1013  
1014  
1015  
1016  
1017

**Figure S3. Related to Figure 1. SIK1 is a light-inducible kinase that specifically regulates the speed of photic entrainment.** (A) SCN tissue was collected at ZT16 and *Sik1*, *Sik2* and *Sik3* expression measured by RT-PCR. SCN expression of (B) *Fos* and *Per1*, and (C) *Sik1*, *Sik2* and *Sik3* in response to no light pulse (sham), a 30 min



1018 light pulse (LP30), and 30 and 90 min following the light pulse (LP60 and LP120,  
1019 respectively). Expression of (D) *Sik1*, *Sik2* and *Sik3* in response to 10  $\mu$ M forskolin,  
1020 and expression of (E) *Sik1*, *Sik2*, *Sik3* and (F) *Fos* in response to 200 nM  
1021 dexamethasone in murine NIH3T3 cells. Expression of (G) *SIK1*, *SIK2* and *SIK3* in  
1022 response to 10  $\mu$ M forskolin, and expression of (H) *SIK1*, *SIK2*, *SIK3*, and (I) *FOS* in  
1023 response to 200 nM dexamethasone in human U2OS cells. (J) phase (activity onset  
1024 minus dark onset) and (K) percentage of total activity within the first 6 hours after dark  
1025 onset, following a 6-hour light advance of WT and SIK1 KI animals. (L) phase and (M)  
1026 percentage of total activity, following a 6-hour dark advance. WT and SIK1 KI animals  
1027 were subjected to a repeated LD shift paradigm where after each 6-hour LD cycle  
1028 advance and subsequent re-entrainment, the light intensity was reduced by one third  
1029 and the 6-hour advance repeated. Phase analysis of the (N) 100, (O) 30, (P) 10, (Q)  
1030 3 and (R) 1 lux periods. (W-Y) WT and SIK1 KI animals were housed in DD and  
1031 subjected to multiple 30 min, 100 lux nocturnal light pulses (S, actogram with phase  
1032 shift calculation highlighted). (T) Phase response curve analysis. (U) Average number  
1033 of wheel revolutions in the 30 minutes before, and during, the light pulse. Actograms  
1034 from (V) WT and (W) SIK1 KI animals, and (X) phase following a 6-hour light advance  
1035 and release into DD on day 3. (Y) Circadian period of days 1-3 and 4-7, following  
1036 release into DD. Data are mean  $\pm$  SEM, n = (A-C) 5, (D-I) 3, (J-M) 6-10, (N-U) 9-13  
1037 and (V-Y) 6-10. Statistical analysis was conducted by (B-I) one-way ANOVA with  
1038 Dunnett's correction or (J-Y) two-way ANOVA with Sidak's correction ns  $P > 0.05$ , \*  $P$   
1039  $< 0.05$ , \*\*  $P < 0.01$ , \*\*\*  $P < 0.001$ , either to control or comparing between the genotypes  
1040 at the indicated time points. ††  $P < 0.01$ , †††  $P < 0.001$  for an overall genotype effect  
1041 as determined by two-way ANOVA. ‡‡‡  $P < 0.001$  comparing activity counts before  
1042 and after light pulsing.

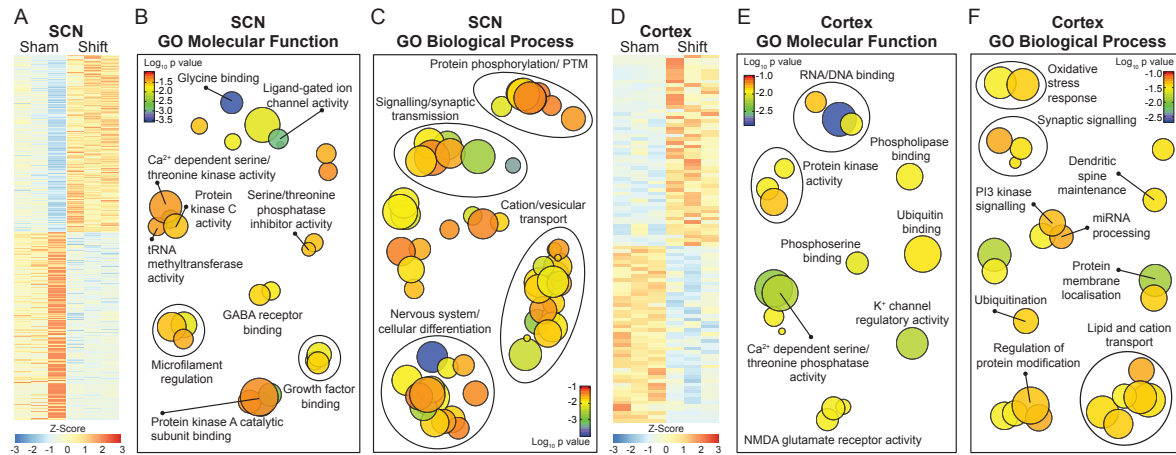

1043 **Figure S4. Related to Figure 2. Nocturnal light exposure remodels the SCN and**  
1044 **cortical transcriptome.** SCN and cortex samples were collected either 6 hours into  
1045 a 6-hour light advance (Shift) or at the same relative time, but without a light shift  
1046 (Sham), and RNA sequencing performed. (A) Heatmap of differentially expressed  
1047 SCN genes. (B) GO molecular function and (C) GO biological process pathway  
1048 analysis of SCN differential genes. (D) Heatmap of differentially expressed cortex  
1049 genes. (E) GO molecular function and (F) GO biological process pathway analysis of  
1050 cortex differential genes. (A and D) Data are z score normalised per row. n = 3-6.

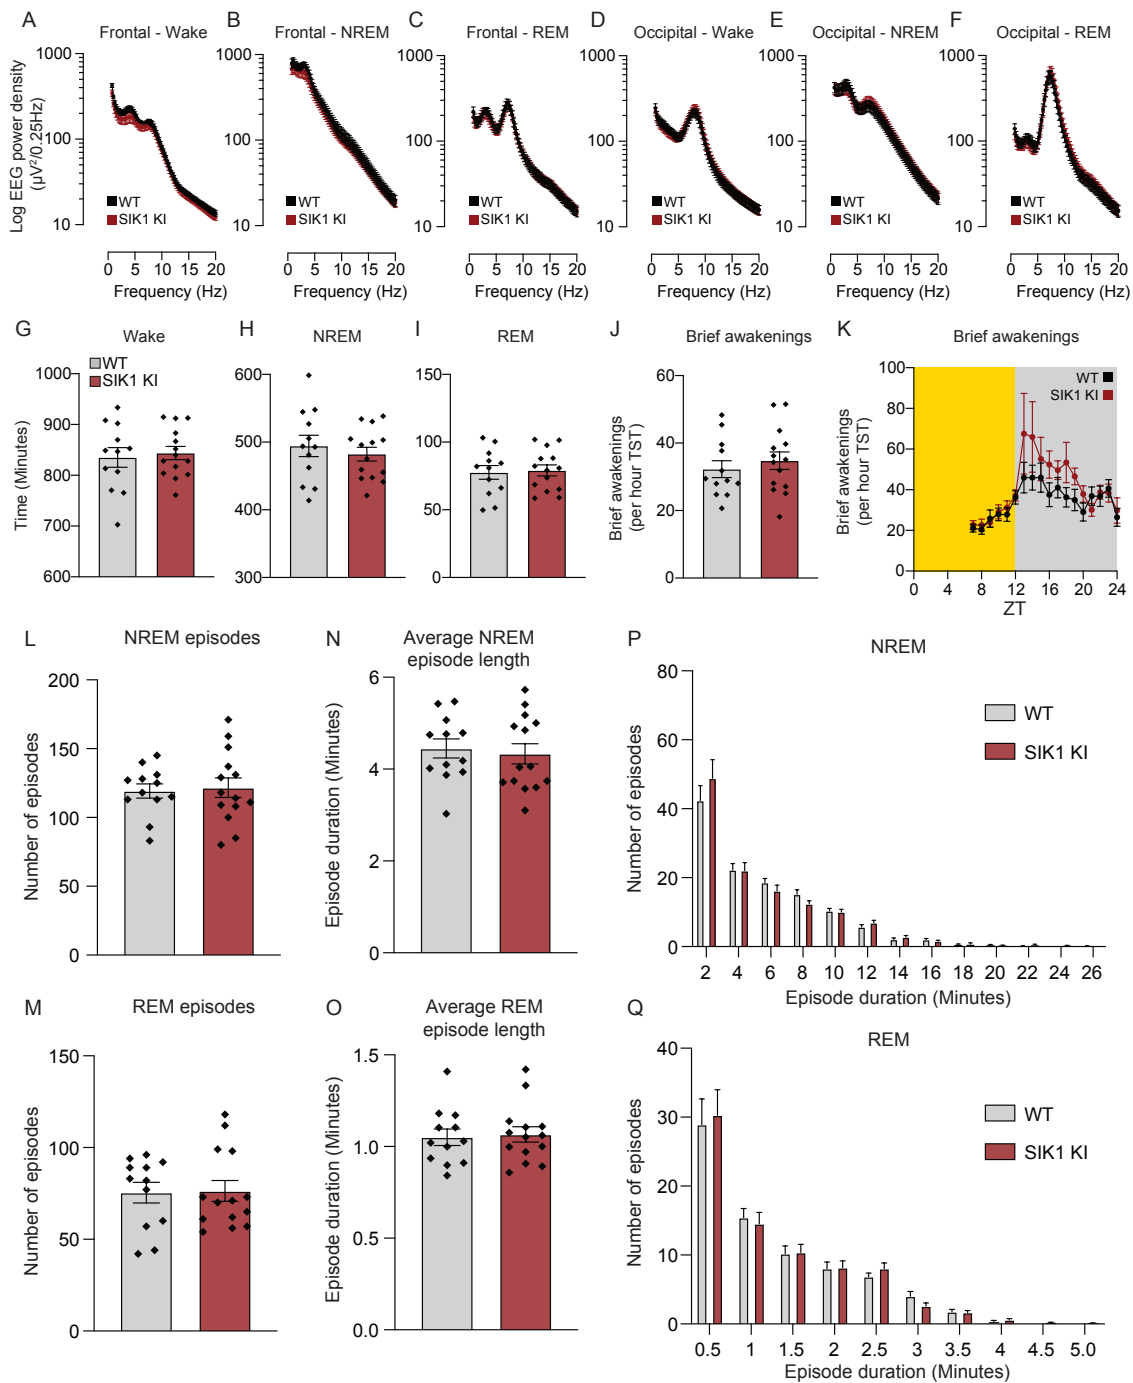

1051 **Figure S5. Related to Figure 3 and Figure 4. SIK1 KI animals have normal**  
 1052 **rebound sleep and sleep architecture following 6 hours of sleep deprivation. WT**  
 1053 **and SIK1 KI animals were housed under a 12:12 LD cycle with continuous sleep**  
 1054 **recording. Sleep deprivation was then conducted from ZT0 – ZT6. Average frontal**  
 1055 **EEG spectra during (A) wake, (B) NREM and (C) REM, and average occipital EEG**  
 1056 **spectra during (D) wake, (E) NREM and (F) REM over the entire sleep deprivation**  
 1057 **day. Total (G) wake, (H) NREM and (I) REM over the entire sleep deprivation day.**  
 1058 **Brief awakenings per total hour sleep time (J) over the entire sleep deprivation day or**

1059 (K) in 1-hours bins. Total (L) NREM and (M) REM sleep episodes. Average (N) NREM  
1060 and (O) REM episode duration. Histogram analysis of (P) NREM and (Q) REM episode  
1061 duration. Data are (A-O) Mean  $\pm$  SEM or (P,Q) Mean + SEM. n = 12-14. Statistical  
1062 analysis was conducted by (A-F, K, P, Q) two-way ANOVA with Sidak's correction or  
1063 by (G-J, L-O) two-tailed student's t-test. ns P > 0.05, \*\*\* P < 0.001.

1064

1065

1066 **Table S1. RNA sequencing of sham and jet lag SCN and Cortex**

1067

1068

1069 **Table S2. Whole brain quantitative phosphoproteomics of sham and LD cycle**  
1070 **shifted WT and SIK1 KI mice**

1071

1072

1073 **Table S3. Overlapping phosphoprotein lists from the LD cycle shift experiments**

1074

1075

1076 **Table S4. Whole brain quantitative phosphoproteomics of sham and sleep**  
1077 **deprived WT and SIK1 KI mice and phosphoprotein overlaps**

1078

1079

1080 **Table S5. RT-PCR primer sequences**
